# Supplementary material for: On the energetic and magnetic stability of potassium atomic clusters doped by yttrium
Source: Royal Society of Chemistry journal article supplement (doi:10.1039/d4cp01185f), 2024-01-01
Supplement: d4cp01185f1.pdf [file d4cp01185f1.pdf]

# On the energetic and magnetic stability of potassium atomic clusters doped by yttrium

Henry Nicole González-Ramírez,<sup>\*a</sup> Zeferino Gómez-Sandoval,<sup>a</sup>

## Supplementary information

---

<sup>a</sup> Facultad de Ciencias Químicas, Universidad de Colima, Km. 9 Carretera Colima-Coquimatlán s/n, 28400, Coquimatlán, Colima, México. E-mail: henrygonzalezr@gmail.com



Table S1 Ground state supershell configurations\* for  $K_{n+1}$ ,  $K_n Y$ ,  $K_n Y^+$  and  $K_n Y^-$  clusters, for  $n = 12 - 24$

| $n$ | $K_{n+1}$                                           | $K_n Y$                                             | $K_n Y^+$                                            | $K_n Y^-$                                            |
|-----|-----------------------------------------------------|-----------------------------------------------------|------------------------------------------------------|------------------------------------------------------|
| 12  | $1S^2 1P^6 1D^3 1D^2_{\alpha\beta}$                 | $1S^2 1P^6 2S^2 1D^5_{\alpha}$                      | $1S^2 1P^6 1D^5_{\alpha} 2S^1_{\alpha}$              | $1S^2 1P^6 2S^2 1D^3_{\alpha} 1D^1_{\beta}$          |
| 13  | $1S^2 1P^6 1D^6$                                    | $1S^2 1P^6 2S^2 1D^5_{\alpha} 1D^1_{\beta}$         | $1S^2 1P^6 1D^5_{\alpha} 1D^1_{\beta} 2S^1_{\alpha}$ | $1S^2 1P^6 2S^2 1D^5_{\alpha} 1D^2_{\beta}$          |
| 14  | $1S^2 1P^6 1D^4_{\alpha} 1D^3_{\beta}$              | $1S^2 1P^6 2S^2 1D^5_{\alpha} 1D^2_{\beta}$         | $1S^2 1P^6 2S^2 1D^5_{\alpha} 1D^1_{\beta}$          | $1S^2 1P^6 2S^2 1D^5_{\alpha} 1D^3_{\beta}$          |
| 15  | $1S^2 1P^6 1D^8$                                    | $1S^2 1P^6 2S^2 1D^5_{\alpha} 1D^3_{\beta}$         | $1S^2 1P^6 2S^2 1D^5_{\alpha} 1D^2_{\beta}$          | $1S^2 1P^6 2S^2 1D^5_{\alpha} 1D^4_{\beta}$          |
| 16  | $1S^2 1P^6 1D^5_{\alpha} 1D^4_{\beta}$              | $1S^2 1P^6 2S^2 1D^5_{\alpha} 1D^4_{\beta}$         | $1S^2 1P^6 2S^2 1D^5_{\alpha} 1D^3_{\beta}$          | $1S^2 1P^6 2S^2 1D^{10}$                             |
| 17  | $1S^2 1P^6 1D^{10}$                                 | $1S^2 1P^6 2S^2 1D^{10}$                            | $1S^2 1P^6 2S^2 1D^5_{\alpha} 1D^4_{\beta}$          | $1S^2 1P^6 2S^2 1D^{10} 1F^1_{\alpha}$               |
| 18  | $1S^2 1P^6 1D^{10} 2S^1_{\alpha}$                   | $1S^2 1P^6 2S^2 1D^{10} 1F^1_{\alpha}$              | $1S^2 1P^6 2S^2 1D^{10}$                             | $1S^2 1P^6 2S^2 1D^{10} 1F^2$                        |
| 19  | $1S^2 1P^6 1D^{10} 2S^2$                            | $1S^2 1P^6 2S^2 1D^{10} 1F^2_{\alpha}$              | $1S^2 1P^6 2S^2 1D^{10} 1F^1_{\alpha}$               | $1S^2 1P^6 2S^2 1D^{10} 1F^2_{\alpha} 1F^1_{\beta}$  |
| 20  | $1S^2 1P^6 1D^{10} 2S^2 1F^1_{\alpha}$              | $1S^2 1P^6 1D^{10} 2S^2 1F^2_{\alpha} 1F^1_{\beta}$ | $1S^2 1P^6 1D^{10} 2S^2 1F^2$                        | $1S^2 1P^6 1D^{10} 2S^2 1F^3_{\alpha} 1F^1_{\beta}$  |
| 21  | $1S^2 1P^6 1D^{10} 2S^2 1F^2$                       | $1S^2 1P^6 1D^{10} 2S^2 1F^3_{\alpha} 1F^1_{\beta}$ | $1S^2 1P^6 1D^{10} 2S^2 1F^2_{\alpha} 1F^1_{\beta}$  | $1S^2 1P^6 1D^{10} 2S^2 1F^3_{\alpha} 1F^2_{\beta}$  |
| 22  | $1S^2 1P^6 1D^{10} 2S^2 1F^2_{\alpha} 1F^1_{\beta}$ | $1S^2 1P^6 1D^{10} 2S^2 1F^3_{\alpha} 1F^2_{\beta}$ | $1S^2 1P^6 1D^{10} 2S^2 1F^3_{\alpha} 1F^1_{\beta}$  | $1S^2 1P^6 1D^{10} 2S^2 1F^6$                        |
| 23  | $1S^2 1P^6 1D^{10} 2S^2 1F^4$                       | $1S^2 1P^6 1D^{10} 2S^2 1F^6$                       | $1S^2 1P^6 1D^{10} 2S^2 1F^3_{\alpha} 1F^2_{\beta}$  | $1S^2 1P^6 1D^{10} 2S^2 1F^4_{\alpha} 1F^3_{\alpha}$ |
| 24  | $1S^2 1P^6 1D^{10} 2S^2 1F^3_{\alpha} 1F^2_{\beta}$ | $1S^2 1P^6 1D^{10} 2S^2 1F^5_{\alpha} 1F^2_{\beta}$ | $1S^2 1P^6 1D^{10} 2S^2 1F^6$                        | $1S^2 1P^6 1D^{10} 2S^2 1F^8$                        |

\*In this Table the filling of the valence electron supershells of the clusters under study is shown. This information is included as it allows us to understand the evolution of shell filling as the cluster increases in size and as it acquires a different charge. Furthermore, it enables us to identify the number of unpaired electrons and, consequently, the spin magnetic moment in a given cluster. However, it is important to note that this notation differs slightly from that used in our previous work with yttrium-doped lithium clusters. In this configuration, we still consider the energy order of the shells and their corresponding electron population. However, this time, we indicate full shells if they appear in the energy order and contain all the corresponding electrons. Thus, a configuration like  $1S^2 1P^6 1D^3_{\alpha} 1D^3_{\beta} 2S^2 1D^2_{\alpha} 1D^2_{\beta} 1F^1_{\alpha}$  appears as  $1S^2 1P^6 1D^{10} 2S^2 1F^1_{\alpha}$ . This notation aligns more with the usual superatom context and allows for a more compact configuration.

Table S2 Ground-state supershell configurations\* for the neutral and charged clusters doped by two and three yttrium atoms

| Neutral cluster | Supershells                                 | Cation cluster | Supershells                                         | Anion cluster  | Supershells                                         |
|-----------------|---------------------------------------------|----------------|-----------------------------------------------------|----------------|-----------------------------------------------------|
| $K_{11} Y_2$    | $1S^2 1P^6 2S^2 1D^5_{\alpha} 1D^2_{\beta}$ | $K_{11} Y_2^+$ | $1S^2 1P^6 2S^2 1D^5_{\alpha} 1D^1_{\beta}$         | $K_{11} Y_2^-$ | $1S^2 1P^6 2S^2 1D^5_{\alpha} 1D^3_{\beta}$         |
| $K_{10} Y_3$    | $1S^2 1P^6 2S^2 1D^5_{\alpha} 1D^4_{\beta}$ | $K_{10} Y_3^+$ | $1S^2 1P^6 2S^2 1D^5_{\alpha} 1D^3_{\beta}$         | $K_{10} Y_3^-$ | $1S^2 1P^6 2S^2 1D^{10}$                            |
| $K_{20} Y_2$    | $1S^2 1P^6 2S^2 1D^{10} 1F^6$               | $K_{20} Y_2^+$ | $1S^2 1P^6 1D^{10} 1F^5_{\alpha} 1F^2_{\beta}$      | $K_{20} Y_2^-$ | $1S^2 1P^6 1D^{10} 1F^5_{\alpha} 1F^4_{\beta}$      |
| $K_{19} Y_3$    | $1S^2 1P^6 2S^2 1D^{10} 1F^8$               | $K_{19} Y_3^+$ | $1S^2 1P^6 2S^2 1D^{10} 1F^4_{\alpha} 1F^3_{\beta}$ | $K_{19} Y_3^-$ | $1S^2 1P^6 2S^2 1D^{10} 1F^5_{\alpha} 1F^4_{\beta}$ |

\*In this Table the filling of the valence electron supershells of the clusters under study is shown. This information is included as it allows us to understand the evolution of shell filling as the cluster increases in size and as it acquires a different charge. Furthermore, it enables us to identify the number of unpaired electrons and, consequently, the spin magnetic moment in a given cluster. However, it is important to note that this notation differs slightly from that used in our previous work with yttrium-doped lithium clusters. In this configuration, we still consider the energy order of the shells and their corresponding electron population. However, this time, we indicate full shells if they appear in the energy order and contain all the corresponding electrons. Thus, a configuration like  $1S^2 1P^6 1D^3_{\alpha} 1D^3_{\beta} 2S^2 1D^2_{\alpha} 1D^2_{\beta} 1F^1_{\alpha}$  appears as  $1S^2 1P^6 1D^{10} 2S^2 1F^1_{\alpha}$ . This notation aligns more with the usual superatom context and allows for a more compact configuration.

Table S3 Cartesian coordinates of the K<sub>13</sub> cluster

---

Energy:-7800.744136848  
Multiplicity:2

| Atom | x         | y         | z         |
|------|-----------|-----------|-----------|
| K    | 0.000000  | 0.000000  | 0.000000  |
| K    | 0.000000  | 0.000000  | 4.357258  |
| K    | 4.208461  | 0.000000  | 1.980235  |
| K    | 2.011159  | 3.702416  | 2.491600  |
| K    | -0.507908 | 3.657112  | 6.614716  |
| K    | -2.351590 | 3.717760  | 2.338152  |
| K    | -6.683408 | 2.589599  | 2.081130  |
| K    | -3.774279 | -0.735610 | 2.166150  |
| K    | -4.361782 | 1.672260  | 5.897561  |
| K    | -0.043862 | 4.481558  | -1.323883 |
| K    | -0.076235 | 1.213636  | -4.301584 |
| K    | 3.665167  | 2.050102  | -1.854774 |
| K    | -3.853282 | 1.898788  | -1.597702 |

Table S4 Cartesian coordinates of the K<sub>14</sub> cluster

---

Energy:-8400.809046290  
Multiplicity:1

| Atom | x         | y         | z         |
|------|-----------|-----------|-----------|
| K    | 0.000000  | 0.000000  | 0.000000  |
| K    | 0.000000  | 0.000000  | 4.348173  |
| K    | 4.114033  | 0.000000  | -2.050695 |
| K    | 2.854466  | 2.417195  | 2.260659  |
| K    | 6.839092  | 1.198879  | 1.209790  |
| K    | 3.535934  | -2.286944 | 1.680251  |
| K    | 4.714453  | -0.605930 | 5.449435  |
| K    | 2.018171  | -4.008886 | 5.339552  |
| K    | 2.715099  | 2.769929  | 7.222155  |
| K    | 0.788153  | -0.973789 | 8.589709  |
| K    | -2.279616 | -3.435013 | 6.228512  |
| K    | -0.915693 | -4.015913 | 1.898831  |
| K    | 6.422820  | 3.649557  | 4.916062  |
| K    | 1.353563  | -3.654804 | -2.068527 |

Table S5 Cartesian coordinates of the K<sub>15</sub> cluster

---

Energy:-9000.865491446  
Multiplicity:2

| Atom | x         | y        | z         |
|------|-----------|----------|-----------|
| K    | 0.000000  | 0.000000 | 0.000000  |
| K    | 0.000000  | 0.000000 | 4.289090  |
| K    | 3.974219  | 0.000000 | 2.655345  |
| K    | 0.472162  | 4.945227 | 3.685281  |
| K    | 1.889681  | 8.770443 | 1.407487  |
| K    | 3.654418  | 7.734477 | 5.244294  |
| K    | -0.493344 | 9.513799 | 5.037468  |
| K    | -2.295450 | 7.627618 | 1.393486  |
| K    | 3.225476  | 2.646454 | 6.182519  |
| K    | 0.453831  | 6.129331 | 7.946442  |
| K    | -3.487870 | 6.071499 | 5.434337  |
| K    | -2.952004 | 2.682718 | 2.142105  |
| K    | 0.461092  | 4.493224 | -0.780095 |
| K    | 3.814803  | 1.581475 | -1.467915 |
| K    | 4.566191  | 4.474327 | 1.883491  |

Table S6 Cartesian coordinates of the K<sub>16</sub> cluster

---

Energy:-9600.927430292  
 Multiplicity:1

| Atom | x         | y         | z         |
|------|-----------|-----------|-----------|
| K    | 0.000000  | 0.000000  | 0.000000  |
| K    | 0.000000  | 0.000000  | 4.589603  |
| K    | 4.654246  | 0.000000  | 1.172147  |
| K    | -2.393524 | -3.451535 | 1.542029  |
| K    | 3.878705  | 2.200717  | 4.998922  |
| K    | -4.074522 | -0.478828 | -2.091211 |
| K    | -2.006027 | 3.385352  | -1.878355 |
| K    | 3.999893  | -2.274798 | 4.982149  |
| K    | -0.043140 | -4.415742 | 5.154403  |
| K    | -0.954665 | -3.454120 | -2.890056 |
| K    | 3.011551  | -1.496138 | -3.064091 |
| K    | -0.278923 | 0.475144  | -4.915673 |
| K    | 0.931841  | 3.560457  | 2.132110  |
| K    | 5.374737  | 4.379078  | 1.089114  |
| K    | 2.230660  | -3.557779 | 1.199770  |
| K    | 2.675931  | 3.064450  | -2.238757 |

Table S7 Cartesian coordinates of the K<sub>17</sub> cluster

---

Energy:-10200.993130733  
 Multiplicity:2

| Atom | x         | y         | z         |
|------|-----------|-----------|-----------|
| K    | 0.000000  | 0.000000  | 0.000000  |
| K    | 0.000000  | 0.000000  | 4.365348  |
| K    | 4.382579  | 0.000000  | 0.168995  |
| K    | -3.626127 | 1.793339  | -1.467392 |
| K    | -0.836775 | -2.149391 | -3.657453 |
| K    | -4.082220 | -2.749256 | -0.611074 |
| K    | -0.735199 | -5.562618 | -0.637880 |
| K    | 3.257829  | -3.904054 | -2.020292 |
| K    | 3.511107  | -0.174727 | -4.313171 |
| K    | -0.212427 | 2.325455  | -4.293637 |
| K    | -0.593269 | 5.297713  | -1.161287 |
| K    | -2.344856 | 3.744318  | 2.552508  |
| K    | -4.539822 | 0.026145  | 2.851257  |
| K    | -2.122900 | -3.758995 | 3.341322  |
| K    | 2.090440  | -3.478079 | 2.292230  |
| K    | 3.630362  | 3.771222  | -2.172397 |
| K    | 2.213925  | 3.455550  | 2.000051  |

Table S8 Cartesian coordinates of the K<sub>18</sub> cluster

---

Energy:-10801.056980247  
Multiplicity:1

| Atom | x         | y         | z         |
|------|-----------|-----------|-----------|
| K    | 0.000000  | 0.000000  | 0.000000  |
| K    | 0.000000  | 0.000000  | 4.891029  |
| K    | 2.488356  | 0.000000  | -4.220811 |
| K    | 2.900158  | -3.298782 | 3.420370  |
| K    | 3.966659  | -2.679698 | -0.982581 |
| K    | 0.833978  | -5.772406 | 0.224155  |
| K    | 0.741676  | -4.088986 | -3.830108 |
| K    | -1.374156 | -4.246307 | 3.615018  |
| K    | -2.178953 | -1.044865 | -4.715268 |
| K    | 2.621258  | 3.514344  | -1.393489 |
| K    | -0.831879 | 2.970856  | -4.212501 |
| K    | -1.561598 | 5.033061  | -0.408990 |
| K    | -3.108426 | 3.088528  | 3.125822  |
| K    | -4.015807 | -1.018759 | 2.657984  |
| K    | -2.908078 | -3.505375 | -0.946545 |
| K    | -4.082705 | 1.262565  | -1.244085 |
| K    | 1.230479  | 4.028858  | 2.987721  |
| K    | 3.908815  | 0.687364  | 1.981320  |

Table S9 Cartesian coordinates of the K<sub>19</sub> cluster

---

Energy:-11401.117200302  
Multiplicity:2

| Atom | x         | y         | z         |
|------|-----------|-----------|-----------|
| K    | 0.000000  | 0.000000  | 0.000000  |
| K    | 0.000000  | 0.000000  | 4.278299  |
| K    | 3.173984  | 0.000000  | -2.873296 |
| K    | -2.584311 | -3.209979 | -1.139601 |
| K    | -2.543671 | 3.138438  | 1.554210  |
| K    | -0.532760 | 3.129605  | -2.941425 |
| K    | 3.306089  | -2.252106 | 1.491742  |
| K    | -1.627351 | -5.492457 | -4.826033 |
| K    | -4.728624 | -5.471707 | 2.017342  |
| K    | 1.876221  | -4.178439 | -2.442148 |
| K    | 2.784886  | -6.599998 | 1.262401  |
| K    | -0.582541 | -4.180110 | 3.060377  |
| K    | -4.300521 | 0.890999  | -1.932117 |
| K    | -4.148647 | -0.936151 | 2.541991  |
| K    | -0.866051 | -0.955934 | -4.785852 |
| K    | -5.102820 | -2.599928 | -4.813723 |
| K    | -6.997099 | -2.581796 | -0.627648 |
| K    | -1.201389 | -7.282849 | -0.508424 |
| K    | -5.386661 | -6.576291 | -2.400646 |

Table S10 Cartesian coordinates of the K<sub>20</sub> cluster

---

Energy:1  
 Multiplicity:-12001.184141251

| Atom | x         | y         | z         |
|------|-----------|-----------|-----------|
| K    | 0.000000  | 0.000000  | 0.000000  |
| K    | 0.000000  | 0.000000  | 4.502302  |
| K    | 4.503072  | 0.000000  | 0.572315  |
| K    | 2.471405  | 3.674687  | -0.835680 |
| K    | 3.329630  | 3.239596  | 3.538115  |
| K    | 4.084948  | 2.555387  | 7.847675  |
| K    | 1.898446  | -1.321502 | 8.784288  |
| K    | 2.805671  | -4.889506 | 6.294889  |
| K    | -0.223834 | -6.883741 | 3.776483  |
| K    | -1.544075 | -3.641129 | 6.667359  |
| K    | -2.348636 | 0.508759  | 8.397554  |
| K    | 2.189920  | -3.499676 | 2.042227  |
| K    | 0.888273  | 2.532458  | 10.853507 |
| K    | -2.401736 | -3.229383 | 2.209559  |
| K    | -4.285537 | 0.820743  | 1.401942  |
| K    | -4.267829 | 3.080516  | 5.186870  |
| K    | -0.998136 | 3.845741  | 2.140142  |
| K    | -0.042631 | 4.007984  | 6.643591  |
| K    | 4.582485  | -0.933049 | 5.015311  |
| K    | -5.129470 | -1.245438 | 5.210257  |

Table S11 Cartesian coordinates of the K<sub>21</sub> cluster

---

Energy:-12601.239363908  
 Multiplicity:2

| Atom | x         | y         | z         |
|------|-----------|-----------|-----------|
| K    | 0.000000  | 0.000000  | 0.000000  |
| K    | 0.000000  | 0.000000  | 4.002076  |
| K    | 3.945873  | 0.000000  | -1.593183 |
| K    | 3.957499  | -0.074887 | 5.500978  |
| K    | 0.980410  | 3.878825  | 5.547522  |
| K    | 0.979060  | 3.842746  | -1.480082 |
| K    | 1.115853  | -3.755415 | -1.996884 |
| K    | -3.386610 | 2.063390  | -2.007661 |
| K    | 1.162740  | -3.825740 | 5.950599  |
| K    | -3.363107 | 2.120093  | 5.955563  |
| K    | -3.173084 | -2.444108 | 6.048651  |
| K    | 0.073275  | 0.006362  | 8.447934  |
| K    | -3.196554 | -2.421847 | -2.002449 |
| K    | 0.041978  | 0.144930  | -4.516731 |
| K    | 3.721070  | 2.831143  | 2.023443  |
| K    | 1.415452  | 6.624244  | 2.066540  |
| K    | 6.666862  | -0.505089 | 1.934128  |
| K    | 3.199833  | -3.222155 | 1.981617  |
| K    | -2.190318 | 3.956335  | 1.986961  |
| K    | -4.113637 | -0.254121 | 2.019648  |
| K    | -1.361911 | -3.890791 | 2.037188  |

Table S12 Cartesian coordinates of the K<sub>22</sub> cluster

---

Energy:-13201.296215462  
 Multiplicity:1

| Atom | x         | y         | z         |
|------|-----------|-----------|-----------|
| K    | 0.000000  | 0.000000  | 0.000000  |
| K    | 0.000000  | 0.000000  | 4.086940  |
| K    | 3.893388  | 0.000000  | -1.904382 |
| K    | -3.349161 | 1.953404  | 6.146329  |
| K    | -3.461444 | 2.090581  | -1.920383 |
| K    | 0.943793  | 3.815068  | -1.938600 |
| K    | 3.268776  | 2.464279  | 2.321303  |
| K    | 6.599273  | -0.252811 | 1.728248  |
| K    | 5.224344  | 4.337062  | -1.335369 |
| K    | 0.839270  | -3.758208 | 6.168016  |
| K    | 1.925016  | 6.498801  | 1.802657  |
| K    | -1.931500 | 3.986107  | 1.907261  |
| K    | 3.272987  | -3.197537 | 1.983844  |
| K    | -4.086047 | -0.169521 | 2.004070  |
| K    | 4.116496  | -0.487037 | 5.603464  |
| K    | 1.073094  | -3.899231 | -1.789246 |
| K    | 0.678080  | 4.326034  | 5.506682  |
| K    | -1.315674 | -3.934824 | 2.065635  |
| K    | -3.272436 | -2.455917 | -1.888182 |
| K    | -0.177068 | -0.209024 | -4.457620 |
| K    | 0.620795  | 0.650006  | 8.360048  |
| K    | -3.496147 | -2.739524 | 5.971041  |

Table S13 Cartesian coordinates of the K<sub>23</sub> cluster

---

Energy:-13801.357260583  
 Multiplicity:2

| Atom | x         | y         | z         |
|------|-----------|-----------|-----------|
| K    | 0.000000  | 0.000000  | 0.000000  |
| K    | 0.000000  | 0.000000  | 4.090033  |
| K    | 4.068917  | 0.000000  | -1.472584 |
| K    | 1.350618  | -3.639740 | 6.024974  |
| K    | 1.067741  | -3.891143 | -1.467094 |
| K    | 3.888406  | 0.899586  | 6.041013  |
| K    | 0.597827  | 3.985949  | 5.926783  |
| K    | 6.013998  | -2.890970 | 5.939635  |
| K    | -0.057295 | -0.019608 | 8.559844  |
| K    | 1.208405  | 3.818579  | -1.883933 |
| K    | 3.117839  | 3.065496  | 2.129559  |
| K    | 3.993878  | -1.683326 | 9.713637  |
| K    | -3.252093 | -2.318442 | 5.830946  |
| K    | 3.367748  | -2.420785 | 2.230089  |
| K    | 6.722382  | 0.366111  | 2.475573  |
| K    | 1.570514  | -6.440211 | 2.468587  |
| K    | -2.041176 | -4.091338 | 1.923286  |
| K    | -3.216267 | -2.095982 | -2.136018 |
| K    | 0.066725  | 0.018231  | -4.474530 |
| K    | -4.149883 | 0.036331  | 1.884740  |
| K    | -3.295250 | 2.265026  | -2.355846 |
| K    | -1.567888 | 3.820561  | 1.825571  |
| K    | -3.513492 | 2.302278  | 5.839299  |



Table S14 Cartesian coordinates of the K<sub>24</sub> cluster

---

Energy:-14401.418615069  
 Multiplicity:1

| Atom | x         | y         | z         |
|------|-----------|-----------|-----------|
| K    | 0.000000  | 0.000000  | 0.000000  |
| K    | 0.000000  | 0.000000  | 4.174566  |
| K    | 0.000000  | 0.305870  | -4.317862 |
| K    | 0.739778  | 3.714016  | 1.916245  |
| K    | 0.239734  | 0.742925  | 8.424409  |
| K    | 4.762961  | 5.303844  | 1.828603  |
| K    | 1.831340  | -3.574073 | 2.128453  |
| K    | -2.422462 | 6.626833  | 1.835231  |
| K    | -3.862800 | -0.245156 | -1.861215 |
| K    | 2.994006  | 2.946300  | -1.860621 |
| K    | 1.539639  | 7.538600  | 4.093270  |
| K    | -3.844673 | -0.057526 | 6.126638  |
| K    | -1.561897 | 4.074440  | 5.651484  |
| K    | 3.429338  | -1.758492 | -1.888508 |
| K    | 3.675329  | -1.485462 | 5.922871  |
| K    | -1.061776 | -4.225419 | -1.421101 |
| K    | -3.133674 | -2.551187 | 2.191604  |
| K    | -1.666328 | 3.902271  | -1.890487 |
| K    | -0.742620 | -4.159438 | 5.732595  |
| K    | 1.447774  | 7.281576  | -0.643965 |
| K    | 3.078968  | 3.167801  | 5.571199  |
| K    | -1.665985 | -6.840229 | 2.102864  |
| K    | 4.627017  | 0.549358  | 1.921670  |
| K    | -3.989379 | 2.210772  | 2.069655  |

Table S15 Cartesian coordinates of the K<sub>25</sub> cluster

---

Energy:-15001.479415547  
 Multiplicity:2

| Atom | x         | y         | z         |
|------|-----------|-----------|-----------|
| K    | 0.000000  | 0.000000  | 0.000000  |
| K    | 0.000000  | 0.000000  | 4.064060  |
| K    | 0.000000  | 0.118164  | -4.177919 |
| K    | -0.671502 | 0.117799  | 8.248462  |
| K    | -0.493459 | -3.973334 | 5.786323  |
| K    | -3.503778 | 1.572187  | 2.026128  |
| K    | 3.729178  | -1.391644 | 5.901480  |
| K    | 4.114658  | -5.698752 | 5.012621  |
| K    | 1.760612  | -3.723303 | 1.917160  |
| K    | -6.886136 | 3.021254  | -0.475338 |
| K    | -4.222616 | 5.933155  | 1.712119  |
| K    | -7.111141 | -0.870266 | 1.856478  |
| K    | 2.345516  | 3.326680  | -1.743337 |
| K    | -6.944955 | 3.168358  | 4.214546  |
| K    | -0.831231 | -3.925638 | -1.860874 |
| K    | -2.442698 | 3.666739  | 5.783994  |
| K    | 2.209583  | 3.123664  | 6.017014  |
| K    | 3.973153  | -1.447413 | -1.402913 |
| K    | -2.375778 | 3.607709  | -1.761281 |
| K    | -4.178847 | -0.736926 | -1.721440 |
| K    | 0.308685  | 4.534619  | 2.095976  |
| K    | 4.083176  | 1.219624  | 2.219880  |
| K    | 6.206553  | -2.850696 | 2.188406  |
| K    | -4.237809 | -0.823747 | 5.665229  |
| K    | -3.153326 | -3.463166 | 2.000840  |

Table S16 Cartesian coordinates of the K<sub>12</sub>Y cluster

---

Energy: -7239.048452584  
 Multiplicity: 6

| Atom | x         | y         | z         |
|------|-----------|-----------|-----------|
| Y    | 0.000000  | 0.000000  | 0.000000  |
| K    | 0.000000  | 0.000000  | 4.159079  |
| K    | 3.719164  | 0.000000  | 1.866938  |
| K    | 3.009819  | -2.231953 | -1.851276 |
| K    | -0.002150 | -0.003633 | -4.155076 |
| K    | -3.725317 | 0.002108  | -1.865238 |
| K    | -3.010017 | 2.231669  | 1.858049  |
| K    | 1.192072  | 3.783847  | 1.791709  |
| K    | -1.063145 | 3.784337  | -1.873808 |
| K    | 3.038284  | 2.376317  | -1.876884 |
| K    | -1.192584 | -3.778036 | -1.786981 |
| K    | 1.063725  | -3.787515 | 1.878872  |
| K    | -3.038139 | -2.375861 | 1.881058  |

Table S17 Cartesian coordinates of the K<sub>13</sub>Y cluster

---

Energy: -7839.107477857  
 Multiplicity: 5

| Atom | x         | y         | z         |
|------|-----------|-----------|-----------|
| K    | -2.145358 | -0.554745 | 3.248438  |
| K    | 1.631812  | -3.400872 | -2.228221 |
| K    | -0.427024 | 3.612898  | 2.265710  |
| K    | 1.649706  | -3.457729 | 2.142277  |
| K    | 2.387095  | 0.560547  | 3.607134  |
| K    | -2.101788 | -3.552801 | -0.024147 |
| K    | -3.765280 | 2.434858  | 0.016746  |
| K    | 4.551762  | -1.170432 | -0.016477 |
| K    | 3.459494  | 2.931523  | 0.037253  |
| K    | 2.397150  | 0.655228  | -3.586714 |
| K    | -5.621657 | -1.311965 | -0.019048 |
| K    | -2.134184 | -0.490448 | -3.254142 |
| K    | -0.419890 | 3.664493  | -2.184972 |
| Y    | 0.250958  | 0.047957  | -0.004723 |

Table S18 Cartesian coordinates of the K<sub>14</sub>Y cluster

---

Energy: -8439.171690913  
 Multiplicity: 4

| Atom | x         | y         | z         |
|------|-----------|-----------|-----------|
| K    | 0.011860  | -0.298590 | 4.029766  |
| K    | -0.012794 | 0.299402  | -4.029527 |
| K    | 0.465583  | 4.020063  | 2.136203  |
| K    | 4.164329  | -0.326285 | -1.893391 |
| K    | 3.853438  | 1.554034  | 1.957900  |
| K    | -2.488937 | -3.241477 | -2.078212 |
| K    | -3.380831 | 2.349778  | 2.034100  |
| K    | 2.478177  | 3.507837  | -1.619278 |
| K    | 3.381827  | -2.605429 | 1.664025  |
| K    | -4.174717 | 0.590077  | -1.804969 |
| K    | -3.829682 | -1.810810 | 1.739663  |
| K    | 1.680816  | -3.698735 | -2.120113 |
| K    | -0.456701 | -4.303433 | 1.561005  |
| K    | -1.693913 | 3.969692  | -1.574858 |
| Y    | -0.000116 | 0.000324  | -0.000462 |

Table S19 Cartesian coordinates of the K<sub>15</sub>Y cluster

---

Energy: -9039.233640059  
 Multiplicity: 3

| Atom | x         | y         | z         |
|------|-----------|-----------|-----------|
| K    | 0.000000  | 0.000000  | 0.000000  |
| K    | 0.000000  | 0.000000  | 4.672798  |
| K    | 3.614996  | 0.000000  | 2.005747  |
| K    | 0.223119  | -3.579278 | 7.286721  |
| K    | 3.677817  | -2.302955 | 5.453757  |
| K    | -3.408370 | -2.794806 | 5.488383  |
| K    | -3.490182 | -1.444335 | 1.587663  |
| K    | -4.192054 | -5.489503 | 2.040549  |
| K    | 5.049983  | -4.173444 | 1.937937  |
| K    | 2.472185  | -6.681467 | 4.391413  |
| K    | -1.751755 | -6.840837 | 5.421811  |
| K    | -0.964100 | -8.020817 | 1.437137  |
| K    | 2.821886  | -2.622321 | -1.495430 |
| K    | 2.442004  | -6.591799 | -0.380668 |
| K    | -1.289443 | -4.461866 | -1.222276 |
| Y    | 0.321645  | -3.662975 | 2.580660  |

Table S20 Cartesian coordinates of the K<sub>16</sub>Y cluster

---

Energy: -9639.299396071  
 Multiplicity: 2

| Atom | x         | y         | z         |
|------|-----------|-----------|-----------|
| Y    | 0.000000  | 0.000000  | 0.000000  |
| K    | 0.000000  | 0.000000  | 4.319703  |
| K    | 4.009886  | 0.000000  | -1.304873 |
| K    | -3.548057 | 1.939892  | 2.714453  |
| K    | -0.023545 | 4.158144  | 2.768205  |
| K    | -5.850751 | 1.601958  | -0.970513 |
| K    | -2.976443 | -0.493898 | -3.328728 |
| K    | 3.630085  | 2.021049  | 2.655947  |
| K    | 3.409180  | -2.113668 | 2.784459  |
| K    | 2.649469  | -4.071235 | -0.881096 |
| K    | 1.074425  | -1.890749 | -4.155239 |
| K    | -2.068052 | 3.774760  | -1.071889 |
| K    | -0.349326 | -3.918542 | 2.309924  |
| K    | -3.831970 | -1.890363 | 0.798636  |
| K    | -1.526268 | -4.305789 | -1.829509 |
| K    | 0.221361  | 2.181888  | -4.078159 |
| K    | 2.271051  | 3.962654  | -0.851389 |

Table S21 Cartesian coordinates of the K<sub>17</sub>Y cluster

---

Energy: -10239.366269603  
 Multiplicity: 1

| Atom | x         | y         | z         |
|------|-----------|-----------|-----------|
| K    | 0.000000  | 0.000000  | 0.000000  |
| K    | 0.000000  | 0.000000  | 4.344930  |
| K    | 3.892428  | 0.000000  | -1.952486 |
| K    | 4.267237  | -3.464980 | -4.389113 |
| K    | 4.826786  | -6.939638 | -2.191624 |
| K    | -1.760479 | -3.519457 | 2.446626  |
| K    | 0.304649  | -7.329063 | 3.161229  |
| K    | 1.598276  | -8.939564 | -0.550163 |
| K    | -2.441715 | -3.079402 | -1.711393 |
| K    | 0.621598  | -5.932919 | -3.668853 |
| K    | 0.523287  | -1.496819 | -4.113165 |
| K    | -2.133057 | -6.961091 | -0.304308 |
| K    | 2.207134  | -3.824103 | 4.422135  |
| K    | 6.539513  | -3.562806 | 3.988482  |
| K    | 3.819078  | -0.577924 | 2.186614  |
| K    | 4.505918  | -6.870535 | 2.053838  |
| K    | 6.215029  | -3.347975 | -0.365617 |
| Y    | 1.851258  | -4.020681 | -0.077151 |

Table S22 Cartesian coordinates of the K<sub>18</sub>Y cluster

---

Energy: -10839.420562405  
 Multiplicity: 2

| Atom | x         | y         | z         |
|------|-----------|-----------|-----------|
| K    | 0.000000  | 0.000000  | 0.000000  |
| K    | 0.000000  | 0.000000  | 7.203831  |
| K    | 2.519111  | 0.000000  | 3.568095  |
| K    | 0.310679  | 4.514345  | 0.112832  |
| K    | 0.321139  | 4.524403  | 7.101516  |
| K    | 6.522107  | 0.985508  | 3.637083  |
| K    | 7.359715  | 4.598966  | 5.721744  |
| K    | 4.198365  | 6.230736  | 7.814492  |
| K    | 1.454241  | 8.527494  | 5.715583  |
| K    | 1.501220  | 8.519758  | 1.522684  |
| K    | 4.169749  | 6.239073  | -0.682334 |
| K    | 7.261847  | 4.617606  | 1.539304  |
| K    | -1.072606 | 2.337612  | 3.593451  |
| K    | -1.623521 | 6.512002  | 3.616337  |
| K    | 4.072821  | 2.001240  | 0.024852  |
| K    | 4.062786  | 1.996106  | 7.156062  |
| K    | 5.346383  | 8.001654  | 3.648503  |
| K    | -1.607358 | -2.287614 | 3.571090  |
| Y    | 3.022398  | 4.488775  | 3.603474  |

Table S23 Cartesian coordinates of the K<sub>19</sub>Y cluster

---

Energy: -11439.474837194  
 Multiplicity: 3

| Atom | x         | y         | z         |
|------|-----------|-----------|-----------|
| Y    | 0.007439  | -0.403058 | 0.009162  |
| K    | -0.055125 | -0.292214 | 4.385944  |
| K    | 3.827952  | -0.282140 | 2.142220  |
| K    | -3.283480 | 2.432286  | -1.125322 |
| K    | 0.657747  | 2.441552  | -3.405370 |
| K    | -0.835016 | -4.249489 | -1.462495 |
| K    | 1.479202  | -3.985322 | 2.542421  |
| K    | -2.581838 | -3.472067 | 2.576888  |
| K    | 3.536194  | -3.457449 | -0.956337 |
| K    | -2.360023 | -0.493108 | -4.089420 |
| K    | 1.582496  | -1.798135 | -4.291085 |
| K    | -4.502037 | -1.811271 | -0.776967 |
| K    | 2.561732  | 3.511640  | 0.237052  |
| K    | -1.088711 | 3.505518  | 2.348672  |
| K    | 2.666779  | 3.306070  | 4.629447  |
| K    | -4.020818 | 0.535698  | 2.754203  |
| K    | 4.392717  | 0.554953  | -2.107293 |
| K    | -0.829145 | 6.416329  | -1.406557 |
| K    | -2.859766 | 4.812977  | -4.927061 |
| K    | 1.331039  | 7.410751  | 2.333327  |

Table S24 Cartesian coordinates of the K<sub>20</sub>Y cluster

---

Energy: -12039.534254032  
 Multiplicity: 2

| Atom | x         | y         | z         |
|------|-----------|-----------|-----------|
| K    | 4.754483  | -2.364583 | -2.108768 |
| K    | 3.433903  | 4.509048  | -2.008578 |
| K    | 8.326965  | -2.090623 | 0.559110  |
| K    | -0.611832 | 4.168121  | 0.613394  |
| K    | 6.738814  | 1.739904  | -0.589297 |
| K    | -3.946755 | 2.681096  | 2.858447  |
| K    | 2.048329  | 0.690782  | -0.682137 |
| K    | -4.536821 | 3.291448  | -1.234321 |
| K    | -2.808761 | -3.938167 | -2.994856 |
| K    | -6.046874 | -0.523375 | 0.261296  |
| K    | 3.987384  | -1.470231 | 2.469758  |
| K    | -0.796780 | 2.848292  | -3.452047 |
| K    | -3.454264 | -4.121764 | 1.046535  |
| K    | 3.691785  | 3.335395  | 2.368221  |
| K    | 0.782170  | -3.694658 | -0.552445 |
| K    | -3.762982 | -1.217838 | 4.118199  |
| K    | 0.007464  | -3.168224 | 3.530218  |
| K    | 0.074996  | 1.100247  | 3.716531  |
| K    | 0.334548  | -1.261885 | -4.153714 |
| K    | -3.995620 | -0.029973 | -3.805906 |
| Y    | -1.845187 | -0.188605 | 0.009719  |

Table S25 Cartesian coordinates of the K<sub>21</sub>Y cluster

---

Energy: -12639.597552527  
 Multiplicity: 3

| Atom | x         | y         | z         |
|------|-----------|-----------|-----------|
| K    | 0.000000  | 0.000000  | 0.000000  |
| K    | 0.000000  | 0.000000  | 4.373311  |
| K    | 3.951551  | 0.000000  | 1.865703  |
| K    | 2.597508  | -3.881924 | 3.119933  |
| K    | 4.080917  | -7.885915 | 2.097860  |
| K    | 0.386751  | -6.926722 | -0.204549 |
| K    | -3.486057 | -7.304033 | 1.290539  |
| K    | -5.731418 | -3.780012 | 1.976168  |
| K    | -3.746913 | -0.096795 | 1.713642  |
| K    | -0.001115 | -7.570170 | 4.109955  |
| K    | -3.807050 | -5.987811 | 5.419330  |
| K    | -3.813892 | -1.732722 | 5.677916  |
| K    | -0.149711 | -3.894780 | 6.713662  |
| K    | 7.557221  | -1.717757 | 4.065445  |
| K    | 7.596101  | -3.885186 | 7.901797  |
| K    | 7.737036  | -6.198021 | 4.151494  |
| K    | 6.168004  | -4.021948 | 0.509774  |
| K    | 3.856319  | -6.258651 | 6.616145  |
| K    | 3.825460  | -1.528204 | 6.651644  |
| K    | 1.973904  | -3.292465 | -1.366617 |
| K    | -2.638177 | -3.560851 | -1.357899 |
| Y    | -1.360637 | -3.687289 | 2.538191  |

Table S26 Cartesian coordinates of the K<sub>22</sub>Y cluster

---

Energy: -13239.656920576  
 Multiplicity: 2

| Atom | x         | y         | z         |
|------|-----------|-----------|-----------|
| K    | -2.044466 | -4.002616 | -1.616958 |
| K    | -3.028667 | -0.050410 | -4.281908 |
| K    | 2.193463  | -4.852547 | -0.981170 |
| K    | 4.577053  | -3.314677 | 2.196559  |
| K    | 1.342206  | -1.964007 | -3.873469 |
| K    | 5.446110  | -2.177731 | -2.071029 |
| K    | -4.621972 | -2.571961 | 2.115679  |
| K    | -1.695735 | -0.013804 | -0.162422 |
| K    | 0.198660  | -3.149359 | 2.397130  |
| K    | 2.743485  | 0.038912  | 4.341384  |
| K    | 0.109263  | 3.093578  | 2.305262  |
| K    | -2.378572 | 4.054548  | -1.505790 |
| K    | 1.030291  | 2.079843  | -3.659468 |
| K    | 5.193507  | 2.252876  | -2.163425 |
| K    | -8.315165 | -0.180222 | 1.390382  |
| K    | -1.775756 | -0.028107 | 4.677489  |
| K    | 1.969810  | 5.142371  | -0.994999 |
| K    | 6.748039  | 0.115746  | 1.296365  |
| K    | 4.408134  | 3.427708  | 2.080797  |
| K    | -6.325112 | -2.365749 | -1.915286 |
| K    | -6.470158 | 2.196422  | -1.922603 |
| K    | -4.775268 | 2.407344  | 2.114556  |
| Y    | 2.391642  | -0.065622 | 0.097869  |

Table S27 Cartesian coordinates of the K<sub>23</sub>Y cluster

---

Energy: -13839.716957632  
 Multiplicity: 1

| Atom | x         | y         | z         |
|------|-----------|-----------|-----------|
| K    | 0.000000  | 0.000000  | 0.000000  |
| K    | 0.000000  | 0.000000  | 4.522807  |
| K    | 3.753062  | 0.000000  | 2.339384  |
| Y    | -0.017725 | 3.856397  | 2.411049  |
| K    | -3.553693 | 2.444979  | 4.635077  |
| K    | 3.829297  | -2.747832 | -1.221415 |
| K    | 7.630083  | -1.004959 | 0.210934  |
| K    | 7.546072  | -1.117243 | 4.601141  |
| K    | 5.653637  | -4.626785 | 2.293671  |
| K    | 1.237235  | -3.976126 | 2.269267  |
| K    | 3.814624  | 2.106065  | 6.085224  |
| K    | 3.712356  | -2.879269 | 5.839413  |
| K    | -0.117967 | 3.108240  | 7.324158  |
| K    | -2.065663 | 6.543419  | 5.962106  |
| K    | 2.232820  | 6.200996  | 5.334721  |
| K    | 4.671579  | 4.381540  | 2.478487  |
| K    | 2.317346  | 6.411381  | -0.304878 |
| K    | 3.893514  | 2.315747  | -1.274814 |
| K    | -2.015786 | 6.732459  | -0.991829 |
| K    | -0.334441 | 8.308828  | 2.543823  |
| K    | -3.553242 | 2.541376  | 0.152500  |
| K    | -0.058487 | 3.373167  | -2.434826 |
| K    | -4.280361 | 6.074364  | 2.452449  |
| K    | -3.445274 | -1.459112 | 2.273963  |

Table S28 Cartesian coordinates of the K<sub>24</sub>Y cluster

---

Energy: -14439.777775034  
 Multiplicity: 4

| Atom | x         | y         | z         |
|------|-----------|-----------|-----------|
| K    | 4.354581  | 4.882939  | 1.270274  |
| K    | 4.764859  | -3.997850 | 2.309022  |
| K    | -4.421903 | 4.299721  | 1.544692  |
| K    | -2.449760 | -3.225314 | -1.741863 |
| K    | 2.846275  | 3.979597  | -2.843562 |
| K    | 4.891752  | -5.359373 | -1.792956 |
| K    | -3.366130 | 3.929334  | -2.741285 |
| K    | -3.031035 | -2.760560 | 2.626631  |
| K    | 2.058167  | 2.554899  | 4.289244  |
| K    | 0.847605  | -5.223251 | 0.818401  |
| K    | -0.111328 | 3.619921  | 0.412990  |
| K    | 1.079292  | -2.118892 | 4.508940  |
| K    | -7.066019 | 2.113236  | -1.097516 |
| K    | 0.866676  | -0.731562 | 0.484643  |
| K    | -0.376177 | 0.760490  | -3.439599 |
| K    | -6.462859 | -2.202383 | -0.441132 |
| K    | 7.096244  | 2.667137  | -1.470786 |
| K    | 1.368169  | -3.652233 | -3.619294 |
| K    | -6.271753 | 0.470155  | 2.851873  |
| K    | 7.623017  | -1.945209 | -0.781158 |
| K    | 5.096296  | 0.467359  | 1.970127  |
| K    | -2.066960 | 1.278299  | 4.020775  |
| Y    | -3.143742 | 0.575907  | -0.069645 |
| K    | 4.100814  | -0.355410 | -2.827613 |
| K    | -4.660228 | -0.133206 | -4.009548 |

Table S29 Cartesian coordinates of the  $K_{11}Y_2$  cluster

---

Energy:-6677.350428115  
Multiplicity: 4

| Atom | x         | y         | z         |
|------|-----------|-----------|-----------|
| K    | 4.593093  | -0.453518 | 0.123560  |
| K    | 2.625252  | 2.340768  | -2.683763 |
| K    | 2.411792  | 3.070486  | 1.733836  |
| K    | 1.916607  | -0.891354 | 3.700865  |
| K    | 2.200416  | -1.916862 | -3.306658 |
| K    | 1.909160  | -3.950691 | 0.488564  |
| K    | -1.712455 | -3.277509 | -1.701057 |
| K    | -2.023132 | -2.354623 | 2.786026  |
| K    | -1.218109 | 0.787046  | -3.787306 |
| K    | -1.579783 | 1.894036  | 3.325392  |
| K    | -1.232886 | 3.951443  | -0.433766 |
| Y    | 0.062533  | 0.000814  | 0.003129  |
| Y    | -3.346418 | 0.315936  | -0.158804 |

Table S30 Cartesian coordinates of the  $K_{10}Y_3$  cluster

---

Energy: -6115.680781263  
Multiplicity: 2

| Atom | x         | y         | z         |
|------|-----------|-----------|-----------|
| K    | 0.000000  | 0.000000  | 0.000000  |
| K    | 0.000000  | 0.000000  | 4.388774  |
| K    | 3.758502  | 0.000000  | 2.255347  |
| K    | 3.374125  | -2.493744 | -1.362155 |
| K    | 5.539749  | -4.044532 | 2.263490  |
| K    | -2.885843 | -2.501310 | 2.197767  |
| K    | -0.877663 | -4.064595 | 5.904730  |
| K    | -0.746797 | -4.076372 | -1.314043 |
| K    | 2.576103  | -6.553611 | 0.143082  |
| K    | -1.168097 | -6.570510 | 2.274071  |
| Y    | 1.472997  | -3.416617 | 2.589488  |
| Y    | 3.116233  | -2.832307 | 5.477605  |
| Y    | 2.543967  | -6.020345 | 4.451321  |



Table S31 Cartesian coordinates of the K<sub>20</sub>Y<sub>2</sub> cluster

---

Energy: -12077.926271957  
 Multiplicity: 1

| Atom | x         | y         | z         |
|------|-----------|-----------|-----------|
| K    | 0.000000  | 0.000000  | 0.000000  |
| K    | 0.000000  | 0.000000  | 3.978257  |
| K    | 3.648729  | 0.000000  | -1.923433 |
| K    | 7.086220  | -0.709367 | -0.064520 |
| K    | 7.105080  | 0.072389  | 3.705608  |
| K    | 5.435121  | -4.027748 | -2.102716 |
| K    | 3.091572  | -6.859161 | 0.090401  |
| K    | 3.368660  | -6.632634 | 4.192038  |
| K    | 5.821823  | -3.434967 | 5.694999  |
| K    | 1.175391  | -3.563006 | -1.809908 |
| K    | 3.700105  | 0.287853  | 5.992364  |
| K    | 1.452523  | -3.354749 | 6.092470  |
| K    | -0.082395 | -4.296491 | 2.192302  |
| K    | 6.812106  | -4.860207 | 1.858441  |
| K    | -0.293048 | 4.057725  | 1.600017  |
| K    | 1.742491  | 4.185705  | 5.215376  |
| K    | 3.500889  | 6.507540  | 1.928998  |
| K    | 5.953880  | 4.201702  | 4.558679  |
| K    | 2.636433  | 4.134899  | -1.440084 |
| K    | 6.615501  | 3.655477  | 0.353516  |
| Y    | 3.428253  | 1.460934  | 2.032113  |
| Y    | 3.489268  | -2.032138 | 2.006131  |

Table S32 Cartesian coordinates of the K<sub>19</sub>Y<sub>3</sub> cluster

---

Energy: -11516.267650544  
 Multiplicity: 1

| Atom | x         | y         | z         |
|------|-----------|-----------|-----------|
| K    | 0.000000  | 0.000000  | 0.000000  |
| K    | 0.000000  | 0.000000  | 4.400196  |
| K    | 4.233634  | 0.000000  | -1.520217 |
| K    | 1.881727  | 3.803123  | 5.704573  |
| K    | 4.162578  | 0.035672  | 5.897874  |
| K    | 6.240318  | 3.613759  | -0.039760 |
| K    | 2.011764  | -3.902335 | -1.412400 |
| K    | 6.260236  | -3.596559 | -0.018847 |
| K    | 6.277699  | -3.617670 | 4.350072  |
| K    | 9.968645  | 2.110453  | 1.858123  |
| K    | 9.989157  | -2.053307 | 1.892545  |
| K    | -0.603543 | -3.951596 | 2.105064  |
| K    | 3.144263  | -6.083031 | 2.181024  |
| K    | 1.889386  | -3.856694 | 5.693687  |
| K    | 3.088590  | 6.102924  | 2.182553  |
| K    | -0.606164 | 3.958252  | 2.100887  |
| Y    | 6.108424  | 0.006609  | 2.223642  |
| Y    | 3.169416  | 1.704710  | 2.153771  |
| Y    | 3.172901  | -1.694928 | 2.168680  |
| K    | 8.790139  | 0.036222  | 5.588466  |
| K    | 6.287293  | 3.658664  | 4.306879  |
| K    | 1.998366  | 3.900203  | -1.444342 |

Table S33 Intensity and frequency values for the ground state vibrational modes of the K<sub>13</sub> cluster.

| Mode | Frequency<br>[1/cm] | Intensity<br>[Km/mol] | Mode | Frequency<br>[1/cm] | Intensity<br>[Km/mol] |
|------|---------------------|-----------------------|------|---------------------|-----------------------|
| 1    | 17.2                | 0.0                   | 2    | 17.8                | 0.1                   |
| 3    | 19.7                | 0.1                   | 4    | 23.1                | 0.1                   |
| 5    | 24.0                | 0.1                   | 6    | 26.2                | 0.1                   |
| 7    | 27.5                | 0.5                   | 8    | 28.6                | 0.3                   |
| 9    | 28.7                | 0.2                   | 10   | 30.3                | 0.2                   |
| 11   | 31.8                | 0.1                   | 12   | 32.3                | 0.1                   |
| 13   | 35.5                | 0.1                   | 14   | 35.7                | 0.5                   |
| 15   | 37.1                | 0.1                   | 16   | 37.4                | 0.1                   |
| 17   | 40.7                | 0.0                   | 18   | 41.0                | 0.0                   |
| 19   | 42.1                | 0.0                   | 20   | 44.3                | 0.0                   |
| 21   | 47.7                | 0.0                   | 22   | 48.6                | 0.3                   |
| 23   | 50.8                | 0.0                   | 24   | 53.7                | 0.2                   |
| 25   | 59.2                | 0.0                   | 26   | 60.9                | 0.1                   |
| 27   | 61.7                | 0.0                   | 28   | 63.5                | 0.0                   |
| 29   | 67.2                | 0.1                   | 30   | 68.0                | 0.1                   |
| 31   | 68.6                | 0.1                   | 32   | 74.1                | 0.1                   |
| 33   | 75.3                | 0.2                   |      |                     |                       |

Table S34 Intensity and frequency values for the ground state vibrational modes of the K<sub>14</sub> cluster.

| Mode | Frequency<br>[1/cm] | Intensity<br>[Km/mol] | Mode | Frequency<br>[1/cm] | Intensity<br>[Km/mol] |
|------|---------------------|-----------------------|------|---------------------|-----------------------|
| 1    | 17.5                | 0.0                   | 2    | 18.6                | 0.0                   |
| 3    | 20.6                | 0.2                   | 4    | 22.8                | 0.2                   |
| 5    | 23.3                | 0.1                   | 6    | 25.0                | 0.3                   |
| 7    | 26.7                | 0.2                   | 8    | 27.0                | 0.1                   |
| 9    | 27.9                | 0.1                   | 10   | 29.4                | 0.5                   |
| 11   | 30.3                | 0.4                   | 12   | 32.5                | 0.0                   |
| 13   | 33.9                | 0.4                   | 14   | 34.9                | 0.1                   |
| 15   | 37.9                | 0.1                   | 16   | 38.1                | 0.2                   |
| 17   | 39.2                | 0.0                   | 18   | 39.6                | 0.0                   |
| 19   | 40.4                | 0.3                   | 20   | 41.5                | 0.2                   |
| 21   | 42.1                | 0.2                   | 22   | 43.7                | 0.0                   |
| 23   | 47.8                | 0.0                   | 24   | 53.0                | 0.3                   |
| 25   | 55.1                | 0.1                   | 26   | 55.4                | 0.1                   |
| 27   | 58.0                | 0.0                   | 28   | 59.6                | 0.0                   |
| 29   | 61.2                | 0.0                   | 30   | 62.2                | 0.0                   |
| 31   | 66.1                | 0.0                   | 32   | 67.5                | 0.0                   |
| 33   | 69.8                | 0.1                   | 34   | 70.1                | 0.2                   |
| 35   | 81.1                | 0.5                   | 36   | 83.0                | 0.0                   |

Table S35 Intensity and frequency values for the ground state vibrational modes of the K<sub>15</sub> cluster.

| Mode | Frequency<br>[1/cm] | Intensity<br>[Km/mol] | Mode | Frequency<br>[1/cm] | Intensity<br>[Km/mol] |
|------|---------------------|-----------------------|------|---------------------|-----------------------|
| 1    | 14.1                | 0.1                   | 2    | 14.9                | 0.0                   |
| 3    | 15.3                | 0.0                   | 4    | 19.6                | 0.3                   |
| 5    | 22.8                | 0.1                   | 6    | 24.3                | 0.2                   |
| 7    | 25.2                | 0.0                   | 8    | 26.3                | 0.1                   |
| 9    | 27.1                | 1.1                   | 10   | 28.0                | 0.0                   |
| 11   | 28.6                | 0.1                   | 12   | 29.0                | 0.2                   |
| 13   | 32.2                | 0.3                   | 14   | 34.8                | 0.3                   |
| 15   | 35.3                | 0.3                   | 16   | 36.3                | 0.2                   |
| 17   | 37.4                | 0.3                   | 18   | 37.8                | 0.4                   |
| 19   | 38.8                | 0.1                   | 20   | 40.2                | 0.1                   |
| 21   | 42.3                | 0.0                   | 22   | 44.6                | 0.0                   |
| 23   | 45.2                | 0.0                   | 24   | 46.9                | 0.0                   |
| 25   | 47.4                | 0.2                   | 26   | 48.7                | 0.0                   |
| 27   | 51.8                | 0.0                   | 28   | 55.3                | 0.0                   |
| 29   | 55.4                | 0.0                   | 30   | 58.8                | 0.2                   |
| 31   | 59.3                | 0.1                   | 32   | 62.0                | 0.4                   |
| 33   | 62.5                | 1.1                   | 34   | 65.3                | 0.3                   |
| 35   | 66.6                | 0.0                   | 36   | 69.2                | 0.0                   |
| 37   | 71.0                | 0.3                   | 38   | 72.9                | 0.1                   |
| 39   | 76.2                | 0.3                   |      |                     |                       |

Table S36 Intensity and frequency values for the ground state vibrational modes of the K<sub>16</sub> cluster.

| Mode | Frequency<br>[1/cm] | Intensity<br>[Km/mol] | Mode | Frequency<br>[1/cm] | Intensity<br>[Km/mol] |
|------|---------------------|-----------------------|------|---------------------|-----------------------|
| 1    | 13.3                | 0.0                   | 2    | 16.4                | 0.3                   |
| 3    | 17.7                | 0.3                   | 4    | 20.6                | 0.0                   |
| 5    | 20.9                | 0.1                   | 6    | 22.1                | 0.7                   |
| 7    | 24.6                | 0.1                   | 8    | 24.9                | 0.1                   |
| 9    | 26.5                | 0.3                   | 10   | 28.0                | 0.0                   |
| 11   | 29.5                | 0.1                   | 12   | 30.1                | 0.1                   |
| 13   | 31.7                | 0.1                   | 14   | 33.2                | 0.4                   |
| 15   | 34.8                | 0.1                   | 16   | 34.9                | 0.1                   |
| 17   | 35.8                | 0.1                   | 18   | 36.4                | 0.0                   |
| 19   | 36.9                | 0.2                   | 20   | 37.4                | 0.1                   |
| 21   | 39.6                | 0.0                   | 22   | 40.5                | 0.0                   |
| 23   | 43.0                | 0.1                   | 24   | 43.3                | 0.1                   |
| 25   | 43.5                | 0.5                   | 26   | 45.2                | 0.0                   |
| 27   | 50.1                | 0.0                   | 28   | 51.3                | 0.1                   |
| 29   | 52.0                | 0.0                   | 30   | 54.6                | 0.0                   |
| 31   | 56.3                | 0.0                   | 32   | 58.4                | 0.1                   |
| 33   | 59.8                | 0.1                   | 34   | 60.8                | 0.6                   |
| 35   | 61.4                | 0.1                   | 36   | 63.6                | 0.2                   |
| 37   | 66.4                | 0.2                   | 38   | 69.0                | 0.0                   |
| 39   | 71.2                | 0.2                   | 40   | 73.8                | 0.2                   |
| 41   | 75.4                | 0.0                   | 42   | 78.8                | 0.0                   |

Table S37 Intensity and frequency values for the ground state vibrational modes of the K<sub>17</sub> cluster.

| Mode | Frequency<br>[1/cm] | Intensity<br>[Km/mol] | Mode | Frequency<br>[1/cm] | Intensity<br>[Km/mol] |
|------|---------------------|-----------------------|------|---------------------|-----------------------|
| 1    | 4.5                 | 0.4                   | 2    | 14.3                | 0.2                   |
| 3    | 14.5                | 0.1                   | 4    | 17.2                | 0.4                   |
| 5    | 20.9                | 0.2                   | 6    | 22.5                | 0.2                   |
| 7    | 25.0                | 0.1                   | 8    | 26.4                | 0.2                   |
| 9    | 27.3                | 0.2                   | 10   | 28.1                | 0.1                   |
| 11   | 30.2                | 0.0                   | 12   | 30.7                | 0.0                   |
| 13   | 31.0                | 0.1                   | 14   | 32.1                | 0.3                   |
| 15   | 32.6                | 0.3                   | 16   | 32.9                | 0.0                   |
| 17   | 33.8                | 0.1                   | 18   | 34.5                | 0.2                   |
| 19   | 35.5                | 0.0                   | 20   | 36.0                | 0.1                   |
| 21   | 37.1                | 0.1                   | 22   | 39.3                | 0.0                   |
| 23   | 40.8                | 0.0                   | 24   | 41.9                | 0.1                   |
| 25   | 43.1                | 0.5                   | 26   | 44.4                | 0.1                   |
| 27   | 46.7                | 0.1                   | 28   | 50.2                | 0.0                   |
| 29   | 51.1                | 0.0                   | 30   | 53.2                | 0.0                   |
| 31   | 53.5                | 0.0                   | 32   | 56.9                | 0.1                   |
| 33   | 57.3                | 0.0                   | 34   | 58.5                | 0.0                   |
| 35   | 59.3                | 0.2                   | 36   | 60.2                | 0.1                   |
| 37   | 61.0                | 0.1                   | 38   | 63.0                | 0.1                   |
| 39   | 63.3                | 0.0                   | 40   | 64.6                | 0.0                   |
| 41   | 66.9                | 0.0                   | 42   | 67.6                | 0.0                   |
| 43   | 68.0                | 0.0                   | 44   | 70.5                | 0.0                   |
| 45   | 75.0                | 0.1                   |      |                     |                       |

Table S38 Intensity and frequency values for the ground state vibrational modes of the K<sub>18</sub> cluster.

| Mode | Frequency<br>[1/cm] | Intensity<br>[Km/mol] | Mode | Frequency<br>[1/cm] | Intensity<br>[Km/mol] |
|------|---------------------|-----------------------|------|---------------------|-----------------------|
| 1    | 5.5                 | 0.5                   | 2    | 12.5                | 0.0                   |
| 3    | 15.2                | 0.3                   | 4    | 17.2                | 0.1                   |
| 5    | 18.5                | 0.2                   | 6    | 19.1                | 0.1                   |
| 7    | 22.4                | 0.1                   | 8    | 23.1                | 0.1                   |
| 9    | 24.2                | 0.0                   | 10   | 25.7                | 0.2                   |
| 11   | 26.4                | 0.1                   | 12   | 27.0                | 0.1                   |
| 13   | 29.1                | 0.0                   | 14   | 30.0                | 0.1                   |
| 15   | 31.3                | 0.1                   | 16   | 32.2                | 0.0                   |
| 17   | 32.5                | 0.1                   | 18   | 33.3                | 0.2                   |
| 19   | 34.1                | 0.2                   | 20   | 34.5                | 0.2                   |
| 21   | 37.4                | 0.5                   | 22   | 38.4                | 0.2                   |
| 23   | 39.1                | 0.3                   | 24   | 40.3                | 0.1                   |
| 25   | 41.5                | 0.1                   | 26   | 42.6                | 0.2                   |
| 27   | 43.7                | 0.4                   | 28   | 44.5                | 0.1                   |
| 29   | 46.6                | 0.1                   | 30   | 51.6                | 0.1                   |
| 31   | 52.6                | 0.0                   | 32   | 55.4                | 0.0                   |
| 33   | 56.6                | 0.0                   | 34   | 56.9                | 0.0                   |
| 35   | 58.2                | 0.2                   | 36   | 58.9                | 0.1                   |
| 37   | 60.0                | 0.0                   | 38   | 60.8                | 0.0                   |
| 39   | 60.9                | 0.1                   | 40   | 61.8                | 0.0                   |
| 41   | 64.8                | 0.0                   | 42   | 66.0                | 0.0                   |
| 43   | 66.6                | 0.1                   | 44   | 67.9                | 0.0                   |
| 45   | 69.4                | 0.0                   | 46   | 70.3                | 0.1                   |
| 47   | 71.7                | 0.0                   | 48   | 77.3                | 0.1                   |

Table S39 Intensity and frequency values for the ground state vibrational modes of the K<sub>19</sub> cluster.

| Mode | Frequency<br>[1/cm] | Intensity<br>[Km/mol] | Mode | Frequency<br>[1/cm] | Intensity<br>[Km/mol] |
|------|---------------------|-----------------------|------|---------------------|-----------------------|
| 1    | 15.4                | 0.0                   | 2    | 17.8                | 0.2                   |
| 3    | 19.7                | 0.0                   | 4    | 20.9                | 0.1                   |
| 5    | 22.1                | 0.0                   | 6    | 22.9                | 0.0                   |
| 7    | 23.7                | 0.0                   | 8    | 24.6                | 0.0                   |
| 9    | 25.1                | 0.2                   | 10   | 27.9                | 0.0                   |
| 11   | 28.8                | 0.0                   | 12   | 29.6                | 0.4                   |
| 13   | 30.3                | 0.0                   | 14   | 31.5                | 0.1                   |
| 15   | 31.8                | 0.3                   | 16   | 32.8                | 0.1                   |
| 17   | 33.6                | 0.2                   | 18   | 34.5                | 0.0                   |
| 19   | 36.9                | 0.3                   | 20   | 37.3                | 0.3                   |
| 21   | 37.8                | 0.0                   | 22   | 38.8                | 0.0                   |
| 23   | 39.5                | 0.2                   | 24   | 40.9                | 0.0                   |
| 25   | 41.7                | 0.0                   | 26   | 41.9                | 0.0                   |
| 27   | 43.2                | 0.0                   | 28   | 43.8                | 0.0                   |
| 29   | 45.0                | 0.0                   | 30   | 46.3                | 0.0                   |
| 31   | 46.7                | 0.0                   | 32   | 48.3                | 0.1                   |
| 33   | 50.1                | 0.0                   | 34   | 51.9                | 0.2                   |
| 35   | 53.0                | 0.1                   | 36   | 54.1                | 0.0                   |
| 37   | 56.9                | 0.0                   | 38   | 57.4                | 0.0                   |
| 39   | 57.8                | 0.0                   | 40   | 59.1                | 0.1                   |
| 41   | 61.4                | 0.1                   | 42   | 62.8                | 0.2                   |
| 43   | 64.5                | 0.0                   | 44   | 64.8                | 0.1                   |
| 45   | 66.4                | 0.0                   | 46   | 67.8                | 0.0                   |
| 47   | 72.9                | 0.3                   | 48   | 73.3                | 0.1                   |
| 49   | 76.1                | 0.1                   | 50   | 76.8                | 0.2                   |
| 51   | 79.6                | 0.0                   |      |                     |                       |

Table S40 Intensity and frequency values for the ground state vibrational modes of the K<sub>20</sub> cluster.

| Mode | Frequency<br>[1/cm] | Intensity<br>[Km/mol] | Mode | Frequency<br>[1/cm] | Intensity<br>[Km/mol] |
|------|---------------------|-----------------------|------|---------------------|-----------------------|
| 1    | 18.1                | 0.2                   | 2    | 19.3                | 0.3                   |
| 3    | 19.8                | 0.3                   | 4    | 23.5                | 0.0                   |
| 5    | 23.8                | 0.0                   | 6    | 24.5                | 0.0                   |
| 7    | 25.1                | 0.1                   | 8    | 25.4                | 0.1                   |
| 9    | 26.9                | 0.0                   | 10   | 27.6                | 0.1                   |
| 11   | 28.1                | 0.1                   | 12   | 28.4                | 0.1                   |
| 13   | 30.5                | 0.1                   | 14   | 30.8                | 0.1                   |
| 15   | 31.5                | 0.2                   | 16   | 32.8                | 0.4                   |
| 17   | 33.0                | 0.1                   | 18   | 33.4                | 0.1                   |
| 19   | 33.9                | 0.2                   | 20   | 34.0                | 0.1                   |
| 21   | 35.0                | 0.1                   | 22   | 35.9                | 0.1                   |
| 23   | 36.5                | 0.1                   | 24   | 38.3                | 0.0                   |
| 25   | 38.7                | 0.0                   | 26   | 39.4                | 0.0                   |
| 27   | 40.3                | 0.1                   | 28   | 41.5                | 0.0                   |
| 29   | 41.8                | 0.2                   | 30   | 42.1                | 0.2                   |
| 31   | 45.3                | 0.2                   | 32   | 46.2                | 0.2                   |
| 33   | 46.5                | 0.2                   | 34   | 51.3                | 0.0                   |
| 35   | 51.5                | 0.0                   | 36   | 52.0                | 0.0                   |
| 37   | 54.9                | 0.0                   | 38   | 55.4                | 0.0                   |
| 39   | 55.7                | 0.0                   | 40   | 57.5                | 0.1                   |
| 41   | 60.7                | 0.0                   | 42   | 61.8                | 0.0                   |
| 43   | 62.3                | 0.1                   | 44   | 63.4                | 0.1                   |
| 45   | 63.5                | 0.1                   | 46   | 64.7                | 0.1                   |
| 47   | 65.0                | 0.0                   | 48   | 65.7                | 0.0                   |
| 49   | 67.6                | 0.1                   | 50   | 68.7                | 0.2                   |
| 51   | 69.1                | 0.3                   | 52   | 71.4                | 0.1                   |
| 53   | 71.6                | 0.2                   | 54   | 72.6                | 0.1                   |

Table S41. Intensity and frequency values for the ground state vibrational modes of the K<sub>21</sub> cluster.

| Mode | Frequency<br>[1/cm] | Intensity<br>[Km/mol] | Mode | Frequency<br>[1/cm] | Intensity<br>[Km/mol] |
|------|---------------------|-----------------------|------|---------------------|-----------------------|
| 1    | 14.3                | 0.1                   | 2    | 19.1                | 0.3                   |
| 3    | 19.5                | 0.3                   | 4    | 21.4                | 0.0                   |
| 5    | 22.0                | 0.2                   | 6    | 22.8                | 0.3                   |
| 7    | 23.8                | 0.2                   | 8    | 25.6                | 0.2                   |
| 9    | 26.2                | 0.3                   | 10   | 26.8                | 0.1                   |
| 11   | 27.2                | 0.3                   | 12   | 28.0                | 0.2                   |
| 13   | 28.5                | 0.2                   | 14   | 30.1                | 0.1                   |
| 15   | 30.7                | 0.0                   | 16   | 31.0                | 0.2                   |
| 17   | 32.9                | 0.1                   | 18   | 33.9                | 0.2                   |
| 19   | 34.2                | 0.0                   | 20   | 34.8                | 0.3                   |
| 21   | 35.3                | 0.1                   | 22   | 35.5                | 0.3                   |
| 23   | 36.6                | 0.1                   | 24   | 37.3                | 0.4                   |
| 25   | 37.9                | 0.2                   | 26   | 38.3                | 0.1                   |
| 27   | 38.7                | 0.1                   | 28   | 40.2                | 0.3                   |
| 29   | 41.0                | 0.4                   | 30   | 41.5                | 0.4                   |
| 31   | 42.5                | 0.2                   | 32   | 43.8                | 0.1                   |
| 33   | 44.2                | 0.0                   | 34   | 46.0                | 0.1                   |
| 35   | 47.6                | 0.1                   | 36   | 48.2                | 0.3                   |
| 37   | 50.3                | 0.0                   | 38   | 51.7                | 0.1                   |
| 39   | 52.3                | 0.0                   | 40   | 53.6                | 0.2                   |
| 41   | 54.3                | 0.2                   | 42   | 55.1                | 0.1                   |
| 43   | 55.8                | 0.2                   | 44   | 57.8                | 0.0                   |
| 45   | 58.5                | 0.8                   | 46   | 59.2                | 0.4                   |
| 47   | 59.7                | 0.2                   | 48   | 60.0                | 0.2                   |
| 49   | 62.9                | 0.1                   | 50   | 65.6                | 0.1                   |
| 51   | 68.7                | 0.2                   | 52   | 72.3                | 0.1                   |
| 53   | 73.7                | 0.0                   | 54   | 75.5                | 0.1                   |
| 55   | 76.5                | 0.1                   | 56   | 77.4                | 0.2                   |
| 57   | 94.3                | 0.0                   |      |                     |                       |

Table S42 Intensity and frequency values for the ground state vibrational modes of the K<sub>22</sub> cluster.

| Mode | Frequency<br>[1/cm] | Intensity<br>[Km/mol] | Mode | Frequency<br>[1/cm] | Intensity<br>[Km/mol] |
|------|---------------------|-----------------------|------|---------------------|-----------------------|
| 1    | 8.0                 | 0.1                   | 2    | 15.0                | 0.1                   |
| 3    | 17.6                | 0.0                   | 4    | 19.2                | 0.1                   |
| 5    | 19.6                | 0.1                   | 6    | 21.7                | 0.0                   |
| 7    | 22.2                | 0.1                   | 8    | 22.4                | 0.2                   |
| 9    | 24.9                | 0.1                   | 10   | 25.6                | 0.3                   |
| 11   | 26.0                | 0.1                   | 12   | 26.7                | 0.2                   |
| 13   | 27.9                | 0.1                   | 14   | 28.9                | 0.0                   |
| 15   | 29.4                | 0.1                   | 16   | 30.5                | 0.1                   |
| 17   | 30.7                | 0.1                   | 18   | 31.2                | 0.2                   |
| 19   | 32.3                | 0.0                   | 20   | 33.0                | 0.0                   |
| 21   | 34.1                | 0.1                   | 22   | 35.2                | 0.0                   |
| 23   | 35.7                | 0.3                   | 24   | 36.3                | 0.1                   |
| 25   | 37.2                | 0.0                   | 26   | 37.7                | 0.2                   |
| 27   | 38.7                | 0.2                   | 28   | 39.1                | 0.1                   |
| 29   | 39.6                | 0.0                   | 30   | 40.4                | 0.1                   |
| 31   | 41.3                | 0.2                   | 32   | 42.2                | 0.2                   |
| 33   | 42.9                | 0.1                   | 34   | 43.7                | 0.0                   |
| 35   | 44.6                | 0.1                   | 36   | 45.2                | 0.1                   |
| 37   | 45.6                | 0.1                   | 38   | 47.7                | 0.0                   |
| 39   | 48.9                | 0.1                   | 40   | 49.7                | 0.1                   |
| 41   | 50.5                | 0.1                   | 42   | 50.9                | 0.2                   |
| 43   | 52.5                | 0.3                   | 44   | 52.9                | 0.1                   |
| 45   | 53.4                | 0.2                   | 46   | 55.4                | 0.3                   |
| 47   | 56.8                | 0.3                   | 48   | 59.0                | 0.0                   |
| 49   | 59.7                | 0.0                   | 50   | 61.8                | 0.0                   |
| 51   | 63.3                | 0.1                   | 52   | 64.7                | 0.2                   |
| 53   | 67.1                | 0.2                   | 54   | 69.3                | 0.3                   |
| 55   | 72.6                | 0.1                   | 56   | 73.8                | 0.3                   |
| 57   | 74.6                | 0.1                   | 58   | 76.5                | 0.1                   |
| 59   | 77.4                | 0.1                   | 60   | 91.2                | 0.1                   |

Table S43 Intensity and frequency values for the ground state vibrational modes of the K<sub>23</sub> cluster.

| Mode | Frequency<br>[1/cm] | Intensity<br>[Km/mol] | Mode | Frequency<br>[1/cm] | Intensity<br>[Km/mol] |
|------|---------------------|-----------------------|------|---------------------|-----------------------|
| 1    | 6.2                 | 0.6                   | 2    | 8.5                 | 2.3                   |
| 3    | 11.1                | 0.5                   | 4    | 14.1                | 0.9                   |
| 5    | 19.1                | 0.9                   | 6    | 19.4                | 0.1                   |
| 7    | 22.1                | 0.1                   | 8    | 22.6                | 0.1                   |
| 9    | 23.4                | 0.2                   | 10   | 24.5                | 0.2                   |
| 11   | 25.6                | 0.1                   | 12   | 26.3                | 0.1                   |
| 13   | 27.5                | 0.1                   | 14   | 28.8                | 0.2                   |
| 15   | 29.2                | 0.2                   | 16   | 29.4                | 0.2                   |
| 17   | 30.0                | 0.2                   | 18   | 30.4                | 0.0                   |
| 19   | 31.4                | 0.3                   | 20   | 31.6                | 0.1                   |
| 21   | 32.4                | 0.1                   | 22   | 33.5                | 0.2                   |
| 23   | 33.7                | 0.2                   | 24   | 34.7                | 0.1                   |
| 25   | 35.8                | 0.5                   | 26   | 36.1                | 0.1                   |
| 27   | 36.9                | 0.0                   | 28   | 38.3                | 0.3                   |
| 29   | 39.2                | 0.5                   | 30   | 40.2                | 0.2                   |
| 31   | 40.3                | 0.2                   | 32   | 40.9                | 0.0                   |
| 33   | 41.5                | 0.1                   | 34   | 41.8                | 0.0                   |
| 35   | 42.6                | 0.3                   | 36   | 43.6                | 0.2                   |
| 37   | 45.4                | 0.5                   | 38   | 46.2                | 0.2                   |
| 39   | 47.0                | 0.1                   | 40   | 47.9                | 0.2                   |
| 41   | 48.2                | 0.6                   | 42   | 49.3                | 0.2                   |
| 43   | 51.5                | 0.0                   | 44   | 51.7                | 0.6                   |
| 45   | 52.1                | 0.2                   | 46   | 53.6                | 0.2                   |
| 47   | 55.0                | 0.2                   | 48   | 55.8                | 0.2                   |
| 49   | 56.8                | 0.1                   | 50   | 58.1                | 0.7                   |
| 51   | 60.4                | 0.2                   | 52   | 60.6                | 0.1                   |
| 53   | 62.2                | 0.0                   | 54   | 64.8                | 0.2                   |
| 55   | 66.4                | 0.1                   | 56   | 67.4                | 0.1                   |
| 57   | 70.7                | 0.2                   | 58   | 72.4                | 0.1                   |
| 59   | 73.7                | 0.2                   | 60   | 75.0                | 0.4                   |
| 61   | 75.4                | 0.1                   | 62   | 76.4                | 0.1                   |
| 63   | 89.3                | 0.3                   |      |                     |                       |



Table S44 Intensity and frequency values for the ground state vibrational modes of the  $K_{24}$  cluster.

| Mode | Frequency<br>[1/cm] | Intensity<br>[Km/mol] | Mode | Frequency<br>[1/cm] | Intensity<br>[Km/mol] |
|------|---------------------|-----------------------|------|---------------------|-----------------------|
| 1    | 14.1                | 0.0                   | 2    | 16.8                | 0.0                   |
| 3    | 17.3                | 0.0                   | 4    | 20.0                | 0.1                   |
| 5    | 20.3                | 0.2                   | 6    | 22.3                | 0.1                   |
| 7    | 22.5                | 0.1                   | 8    | 23.4                | 0.0                   |
| 9    | 24.0                | 0.1                   | 10   | 24.7                | 0.1                   |
| 11   | 26.0                | 0.0                   | 12   | 26.5                | 0.1                   |
| 13   | 26.7                | 0.1                   | 14   | 27.6                | 0.1                   |
| 15   | 28.4                | 0.0                   | 16   | 29.3                | 0.3                   |
| 17   | 30.3                | 0.1                   | 18   | 30.9                | 0.1                   |
| 19   | 32.0                | 0.2                   | 20   | 32.4                | 0.1                   |
| 21   | 33.6                | 0.0                   | 22   | 34.2                | 0.0                   |
| 23   | 34.5                | 0.1                   | 24   | 35.6                | 0.1                   |
| 25   | 36.1                | 0.1                   | 26   | 36.4                | 0.2                   |
| 27   | 37.0                | 0.2                   | 28   | 37.7                | 0.0                   |
| 29   | 38.8                | 0.1                   | 30   | 38.9                | 0.1                   |
| 31   | 39.2                | 0.1                   | 32   | 40.1                | 0.2                   |
| 33   | 40.9                | 0.1                   | 34   | 41.4                | 0.2                   |
| 35   | 42.3                | 0.1                   | 36   | 42.6                | 0.1                   |
| 37   | 43.2                | 0.5                   | 38   | 44.6                | 0.0                   |
| 39   | 46.0                | 0.1                   | 40   | 47.0                | 0.0                   |
| 41   | 47.1                | 0.1                   | 42   | 47.9                | 0.1                   |
| 43   | 48.3                | 0.2                   | 44   | 50.2                | 0.1                   |
| 45   | 51.4                | 0.2                   | 46   | 51.7                | 0.0                   |
| 47   | 52.1                | 0.1                   | 48   | 52.5                | 0.3                   |
| 49   | 53.8                | 0.3                   | 50   | 53.9                | 0.2                   |
| 51   | 55.0                | 0.2                   | 52   | 55.0                | 0.1                   |
| 53   | 55.9                | 0.1                   | 54   | 59.0                | 0.1                   |
| 55   | 60.8                | 0.2                   | 56   | 62.4                | 0.1                   |
| 57   | 66.5                | 0.3                   | 58   | 67.1                | 0.1                   |
| 59   | 69.9                | 0.0                   | 60   | 70.5                | 0.0                   |
| 61   | 73.1                | 0.1                   | 62   | 74.6                | 0.1                   |
| 63   | 75.7                | 0.1                   | 64   | 82.1                | 0.2                   |
| 65   | 82.8                | 0.3                   | 66   | 91.8                | 0.0                   |

Table S45 Intensity and frequency values for the ground state vibrational modes of the K<sub>25</sub> cluster.

| Mode | Frequency<br>[1/cm] | Intensity<br>[Km/mol] | Mode | Frequency<br>[1/cm] | Intensity<br>[Km/mol] |
|------|---------------------|-----------------------|------|---------------------|-----------------------|
| 1    | 7.5                 | 0.2                   | 2    | 11.6                | 0.0                   |
| 3    | 17.3                | 0.0                   | 4    | 18.4                | 0.1                   |
| 5    | 20.1                | 0.0                   | 6    | 20.6                | 0.0                   |
| 7    | 22.4                | 0.0                   | 8    | 23.8                | 0.1                   |
| 9    | 23.9                | 0.1                   | 10   | 24.9                | 0.1                   |
| 11   | 25.3                | 0.0                   | 12   | 26.0                | 0.0                   |
| 13   | 26.9                | 0.1                   | 14   | 27.4                | 0.1                   |
| 15   | 27.7                | 0.5                   | 16   | 28.2                | 0.0                   |
| 17   | 28.8                | 0.2                   | 18   | 28.9                | 0.2                   |
| 19   | 30.0                | 0.1                   | 20   | 30.6                | 0.1                   |
| 21   | 30.7                | 0.0                   | 22   | 32.4                | 0.3                   |
| 23   | 32.8                | 0.0                   | 24   | 33.1                | 0.1                   |
| 25   | 33.9                | 0.2                   | 26   | 34.4                | 0.2                   |
| 27   | 35.0                | 0.4                   | 28   | 35.3                | 0.1                   |
| 29   | 37.1                | 0.2                   | 30   | 37.5                | 0.1                   |
| 31   | 38.3                | 0.1                   | 32   | 38.7                | 0.0                   |
| 33   | 39.2                | 0.0                   | 34   | 40.4                | 1.3                   |
| 35   | 41.1                | 0.0                   | 36   | 41.3                | 0.0                   |
| 37   | 42.4                | 0.9                   | 38   | 42.8                | 0.0                   |
| 39   | 43.5                | 0.3                   | 40   | 44.2                | 0.1                   |
| 41   | 45.1                | 0.1                   | 42   | 46.0                | 0.4                   |
| 43   | 46.8                | 0.0                   | 44   | 47.5                | 0.0                   |
| 45   | 48.6                | 0.0                   | 46   | 50.1                | 0.1                   |
| 47   | 50.8                | 0.0                   | 48   | 51.2                | 0.5                   |
| 49   | 51.3                | 0.1                   | 50   | 52.2                | 0.1                   |
| 51   | 53.5                | 0.0                   | 52   | 53.9                | 0.1                   |
| 53   | 55.1                | 0.1                   | 54   | 56.3                | 0.1                   |
| 55   | 56.8                | 0.1                   | 56   | 58.5                | 0.1                   |
| 57   | 59.4                | 0.1                   | 58   | 60.8                | 0.1                   |
| 59   | 64.3                | 0.1                   | 60   | 65.8                | 0.0                   |
| 61   | 67.9                | 0.2                   | 62   | 68.4                | 0.1                   |
| 63   | 71.8                | 0.0                   | 64   | 72.3                | 0.0                   |
| 65   | 73.6                | 0.1                   | 66   | 74.0                | 0.4                   |
| 67   | 80.6                | 0.1                   | 68   | 81.4                | 0.5                   |
| 69   | 96.6                | 0.0                   |      |                     |                       |

Table S46 Intensity and frequency values for the ground state vibrational modes of the K<sub>12</sub>Y cluster.

| Mode | Frequency<br>[1/cm] | Intensity<br>[Km/mol] | Mode | Frequency<br>[1/cm] | Intensity<br>[Km/mol] |
|------|---------------------|-----------------------|------|---------------------|-----------------------|
| 1    | 8.9                 | 0.0                   | 2    | 23.5                | 0.0                   |
| 3    | 30.9                | 0.0                   | 4    | 31.6                | 0.0                   |
| 5    | 35.0                | 0.0                   | 6    | 37.2                | 0.0                   |
| 7    | 37.6                | 0.1                   | 8    | 45.0                | 0.0                   |
| 9    | 45.5                | 0.0                   | 10   | 47.0                | 0.0                   |
| 11   | 48.1                | 0.0                   | 12   | 51.1                | 0.0                   |
| 13   | 51.7                | 0.5                   | 14   | 52.2                | 0.9                   |
| 15   | 52.4                | 1.0                   | 16   | 55.6                | 0.0                   |
| 17   | 56.3                | 0.0                   | 18   | 56.4                | 0.0                   |
| 19   | 56.7                | 0.0                   | 20   | 60.4                | 0.0                   |
| 21   | 61.0                | 0.0                   | 22   | 61.9                | 0.0                   |
| 23   | 63.0                | 0.1                   | 24   | 67.7                | 0.0                   |
| 25   | 68.3                | 0.0                   | 26   | 68.5                | 0.9                   |
| 27   | 76.0                | 0.0                   | 28   | 76.5                | 0.0                   |
| 29   | 77.6                | 0.0                   | 30   | 80.1                | 0.0                   |
| 31   | 91.1                | 0.7                   | 32   | 97.5                | 1.1                   |
| 33   | 97.9                | 1.1                   |      |                     |                       |

Table S47 Intensity and frequency values for the ground state vibrational modes of the K<sub>13</sub>Y cluster.

| Mode | Frequency<br>[1/cm] | Intensity<br>[Km/mol] | Mode | Frequency<br>[1/cm] | Intensity<br>[Km/mol] |
|------|---------------------|-----------------------|------|---------------------|-----------------------|
| 1    | 12.3                | 0.0                   | 2    | 14.2                | 0.1                   |
| 3    | 25.4                | 0.0                   | 4    | 30.6                | 0.2                   |
| 5    | 31.3                | 0.0                   | 6    | 33.1                | 0.0                   |
| 7    | 35.2                | 0.3                   | 8    | 38.0                | 0.0                   |
| 9    | 39.0                | 0.0                   | 10   | 40.4                | 0.0                   |
| 11   | 41.7                | 0.3                   | 12   | 44.2                | 0.1                   |
| 13   | 47.0                | 0.0                   | 14   | 49.0                | 0.1                   |
| 15   | 50.7                | 0.3                   | 16   | 51.1                | 0.5                   |
| 17   | 53.1                | 0.0                   | 18   | 54.0                | 0.0                   |
| 19   | 56.4                | 0.2                   | 20   | 57.3                | 0.0                   |
| 21   | 58.4                | 0.1                   | 22   | 60.2                | 0.0                   |
| 23   | 60.7                | 0.0                   | 24   | 63.2                | 0.2                   |
| 25   | 65.8                | 0.0                   | 26   | 68.0                | 0.1                   |
| 27   | 70.0                | 0.0                   | 28   | 70.5                | 0.0                   |
| 29   | 74.4                | 0.3                   | 30   | 76.4                | 0.0                   |
| 31   | 78.3                | 0.1                   | 32   | 80.1                | 0.3                   |
| 33   | 84.8                | 0.3                   | 34   | 90.0                | 0.5                   |
| 35   | 95.5                | 1.0                   | 36   | 101.3               | 1.6                   |

Table S48 Intensity and frequency values for the ground state vibrational modes of the K<sub>14</sub>Y cluster.

| Mode | Frequency<br>[1/cm] | Intensity<br>[Km/mol] | Mode | Frequency<br>[1/cm] | Intensity<br>[Km/mol] |
|------|---------------------|-----------------------|------|---------------------|-----------------------|
| 1    | 23.4                | 0.0                   | 2    | 23.7                | 0.0                   |
| 3    | 26.8                | 0.0                   | 4    | 27.2                | 0.0                   |
| 5    | 27.3                | 0.0                   | 6    | 27.8                | 0.0                   |
| 7    | 36.2                | 0.0                   | 8    | 37.7                | 0.0                   |
| 9    | 37.9                | 0.0                   | 10   | 38.2                | 0.0                   |
| 11   | 38.6                | 0.0                   | 12   | 40.3                | 0.0                   |
| 13   | 40.4                | 0.0                   | 14   | 42.6                | 0.4                   |
| 15   | 45.0                | 0.0                   | 16   | 45.3                | 0.0                   |
| 17   | 46.0                | 0.0                   | 18   | 46.1                | 0.0                   |
| 19   | 51.4                | 0.2                   | 20   | 52.2                | 0.2                   |
| 21   | 54.5                | 0.0                   | 22   | 54.6                | 0.0                   |
| 23   | 56.3                | 0.6                   | 24   | 57.5                | 0.0                   |
| 25   | 62.1                | 0.6                   | 26   | 63.1                | 0.6                   |
| 27   | 64.0                | 0.0                   | 28   | 64.1                | 0.0                   |
| 29   | 74.9                | 0.0                   | 30   | 76.4                | 0.0                   |
| 31   | 76.4                | 0.0                   | 32   | 76.8                | 0.5                   |
| 33   | 77.1                | 0.5                   | 34   | 79.0                | 0.0                   |
| 35   | 79.8                | 0.0                   | 36   | 79.9                | 0.0                   |
| 37   | 81.8                | 0.0                   | 38   | 81.8                | 0.0                   |
| 39   | 97.7                | 1.1                   |      |                     |                       |

Table S49 Intensity and frequency values for the ground state vibrational modes of the K<sub>15</sub>Y cluster.

| Mode | Frequency<br>[1/cm] | Intensity<br>[Km/mol] | Mode | Frequency<br>[1/cm] | Intensity<br>[Km/mol] |
|------|---------------------|-----------------------|------|---------------------|-----------------------|
| 1    | 12.4                | 0.0                   | 2    | 23.7                | 0.1                   |
| 3    | 24.4                | 0.0                   | 4    | 25.4                | 0.0                   |
| 5    | 26.5                | 0.0                   | 6    | 27.7                | 0.0                   |
| 7    | 28.8                | 0.0                   | 8    | 30.1                | 0.0                   |
| 9    | 30.9                | 0.0                   | 10   | 31.8                | 0.0                   |
| 11   | 33.3                | 0.1                   | 12   | 34.2                | 0.0                   |
| 13   | 34.8                | 0.0                   | 14   | 35.2                | 0.0                   |
| 15   | 40.6                | 0.0                   | 16   | 41.2                | 0.0                   |
| 17   | 42.0                | 0.0                   | 18   | 43.2                | 0.0                   |
| 19   | 47.6                | 0.1                   | 20   | 48.8                | 0.0                   |
| 21   | 49.6                | 0.1                   | 22   | 53.7                | 0.5                   |
| 23   | 54.0                | 0.1                   | 24   | 57.0                | 0.5                   |
| 25   | 60.4                | 0.1                   | 26   | 60.5                | 0.2                   |
| 27   | 62.7                | 0.0                   | 28   | 64.9                | 0.0                   |
| 29   | 67.9                | 0.1                   | 30   | 69.5                | 0.2                   |
| 31   | 69.8                | 0.1                   | 32   | 70.9                | 0.1                   |
| 33   | 71.4                | 0.0                   | 34   | 73.2                | 0.1                   |
| 35   | 76.1                | 0.0                   | 36   | 79.3                | 0.3                   |
| 37   | 80.5                | 0.0                   | 38   | 84.2                | 0.0                   |
| 39   | 84.6                | 0.1                   | 40   | 87.2                | 0.0                   |
| 41   | 87.8                | 0.3                   | 42   | 91.4                | 0.1                   |

Table S50 Intensity and frequency values for the ground state vibrational modes of the K<sub>16</sub>Y cluster.

| Mode | Frequency<br>[1/cm] | Intensity<br>[Km/mol] | Mode | Frequency<br>[1/cm] | Intensity<br>[Km/mol] |
|------|---------------------|-----------------------|------|---------------------|-----------------------|
| 1    | 15.0                | 0.1                   | 2    | 18.9                | 0.1                   |
| 3    | 21.7                | 0.1                   | 4    | 23.5                | 0.0                   |
| 5    | 24.8                | 0.1                   | 6    | 26.5                | 0.3                   |
| 7    | 28.8                | 0.1                   | 8    | 29.1                | 0.0                   |
| 9    | 30.2                | 0.0                   | 10   | 31.0                | 0.0                   |
| 11   | 33.5                | 0.1                   | 12   | 34.1                | 0.0                   |
| 13   | 35.5                | 0.0                   | 14   | 38.1                | 0.0                   |
| 15   | 38.6                | 0.0                   | 16   | 39.3                | 0.0                   |
| 17   | 41.9                | 0.0                   | 18   | 44.0                | 0.0                   |
| 19   | 45.4                | 0.0                   | 20   | 46.2                | 0.0                   |
| 21   | 48.5                | 0.1                   | 22   | 49.9                | 0.0                   |
| 23   | 52.1                | 0.0                   | 24   | 54.1                | 0.0                   |
| 25   | 54.8                | 0.2                   | 26   | 58.0                | 0.0                   |
| 27   | 60.6                | 0.2                   | 28   | 63.5                | 0.1                   |
| 29   | 64.4                | 0.1                   | 30   | 65.0                | 0.1                   |
| 31   | 68.6                | 0.3                   | 32   | 69.3                | 0.0                   |
| 33   | 70.5                | 0.1                   | 34   | 72.3                | 0.1                   |
| 35   | 72.9                | 0.1                   | 36   | 74.6                | 0.0                   |
| 37   | 75.6                | 0.0                   | 38   | 76.3                | 0.0                   |
| 39   | 78.8                | 0.1                   | 40   | 79.9                | 0.1                   |
| 41   | 80.8                | 0.0                   | 42   | 82.2                | 0.0                   |
| 43   | 83.9                | 0.0                   | 44   | 86.0                | 0.0                   |
| 45   | 88.2                | 0.0                   |      |                     |                       |

Table S51 Intensity and frequency values for the ground state vibrational modes of the K<sub>17</sub>Y cluster.

| Mode | Frequency<br>[1/cm] | Intensity<br>[Km/mol] | Mode | Frequency<br>[1/cm] | Intensity<br>[Km/mol] |
|------|---------------------|-----------------------|------|---------------------|-----------------------|
| 1    | 22.0                | 0.0                   | 2    | 22.9                | 0.1                   |
| 3    | 23.5                | 0.2                   | 4    | 24.1                | 0.0                   |
| 5    | 24.8                | 0.0                   | 6    | 26.9                | 0.0                   |
| 7    | 29.1                | 0.0                   | 8    | 29.3                | 0.0                   |
| 9    | 29.5                | 0.0                   | 10   | 30.2                | 0.1                   |
| 11   | 30.8                | 0.2                   | 12   | 32.6                | 0.3                   |
| 13   | 32.9                | 0.1                   | 14   | 34.8                | 0.1                   |
| 15   | 36.3                | 0.0                   | 16   | 36.8                | 0.0                   |
| 17   | 38.9                | 0.1                   | 18   | 40.8                | 0.0                   |
| 19   | 41.2                | 0.0                   | 20   | 44.3                | 0.1                   |
| 21   | 45.6                | 0.1                   | 22   | 45.8                | 0.1                   |
| 23   | 48.1                | 0.1                   | 24   | 49.7                | 0.0                   |
| 25   | 51.5                | 0.0                   | 26   | 54.1                | 0.0                   |
| 27   | 56.4                | 0.1                   | 28   | 56.8                | 0.1                   |
| 29   | 59.2                | 0.0                   | 30   | 60.8                | 0.0                   |
| 31   | 61.6                | 0.2                   | 32   | 64.1                | 0.0                   |
| 33   | 69.9                | 0.0                   | 34   | 70.0                | 0.0                   |
| 35   | 70.7                | 0.0                   | 36   | 71.1                | 0.3                   |
| 37   | 71.8                | 0.0                   | 38   | 72.5                | 0.2                   |
| 39   | 73.3                | 0.0                   | 40   | 73.7                | 0.0                   |
| 41   | 74.9                | 0.1                   | 42   | 78.3                | 0.2                   |
| 43   | 79.6                | 0.0                   | 44   | 79.7                | 0.1                   |
| 45   | 80.8                | 0.1                   | 46   | 85.0                | 0.0                   |
| 47   | 86.0                | 0.0                   | 48   | 90.2                | 0.0                   |

Table S52 Intensity and frequency values for the ground state vibrational modes of the K<sub>18</sub>Y cluster.

| Mode | Frequency<br>[1/cm] | Intensity<br>[Km/mol] | Mode | Frequency<br>[1/cm] | Intensity<br>[Km/mol] |
|------|---------------------|-----------------------|------|---------------------|-----------------------|
| 1    | 17.3                | 0.0                   | 2    | 21.7                | 0.0                   |
| 3    | 22.1                | 0.2                   | 4    | 23.5                | 0.0                   |
| 5    | 25.0                | 0.1                   | 6    | 25.5                | 0.2                   |
| 7    | 27.6                | 0.1                   | 8    | 28.3                | 0.0                   |
| 9    | 28.9                | 0.0                   | 10   | 30.5                | 0.0                   |
| 11   | 32.1                | 0.0                   | 12   | 32.7                | 0.4                   |
| 13   | 33.6                | 0.6                   | 14   | 34.8                | 0.1                   |
| 15   | 35.8                | 0.0                   | 16   | 36.6                | 0.1                   |
| 17   | 37.4                | 0.3                   | 18   | 37.9                | 0.0                   |
| 19   | 38.6                | 0.2                   | 20   | 41.4                | 0.3                   |
| 21   | 41.8                | 0.4                   | 22   | 42.9                | 0.2                   |
| 23   | 44.7                | 0.0                   | 24   | 47.2                | 0.0                   |
| 25   | 48.0                | 0.0                   | 26   | 48.6                | 0.0                   |
| 27   | 50.6                | 0.0                   | 28   | 52.2                | 0.0                   |
| 29   | 53.0                | 0.0                   | 30   | 55.4                | 0.0                   |
| 31   | 57.3                | 0.0                   | 32   | 60.6                | 0.0                   |
| 33   | 61.4                | 0.0                   | 34   | 62.7                | 0.2                   |
| 35   | 63.1                | 0.1                   | 36   | 68.6                | 0.1                   |
| 37   | 69.8                | 0.0                   | 38   | 70.1                | 0.0                   |
| 39   | 70.8                | 0.0                   | 40   | 71.2                | 0.0                   |
| 41   | 71.9                | 0.0                   | 42   | 72.6                | 0.0                   |
| 43   | 73.0                | 0.0                   | 44   | 75.7                | 0.0                   |
| 45   | 79.6                | 0.0                   | 46   | 80.2                | 0.1                   |
| 47   | 82.3                | 0.4                   | 48   | 82.5                | 0.4                   |
| 49   | 83.3                | 0.0                   | 50   | 88.2                | 0.7                   |
| 51   | 90.6                | 0.0                   |      |                     |                       |

Table S53 Intensity and frequency values for the ground state vibrational modes of the K<sub>19</sub>Y cluster.

| Mode | Frequency<br>[1/cm] | Intensity<br>[Km/mol] | Mode | Frequency<br>[1/cm] | Intensity<br>[Km/mol] |
|------|---------------------|-----------------------|------|---------------------|-----------------------|
| 1    | 15.4                | 0.0                   | 2    | 16.9                | 0.0                   |
| 3    | 19.5                | 0.0                   | 4    | 20.3                | 0.0                   |
| 5    | 21.0                | 0.1                   | 6    | 21.7                | 0.3                   |
| 7    | 23.5                | 0.0                   | 8    | 25.6                | 0.0                   |
| 9    | 26.9                | 0.1                   | 10   | 28.4                | 0.1                   |
| 11   | 29.8                | 0.1                   | 12   | 30.0                | 0.0                   |
| 13   | 30.3                | 0.0                   | 14   | 31.6                | 0.1                   |
| 15   | 32.7                | 0.0                   | 16   | 34.0                | 0.4                   |
| 17   | 34.9                | 0.4                   | 18   | 35.8                | 0.1                   |
| 19   | 35.8                | 0.4                   | 20   | 37.8                | 0.0                   |
| 21   | 38.6                | 0.4                   | 22   | 39.2                | 0.1                   |
| 23   | 41.6                | 0.1                   | 24   | 43.8                | 0.0                   |
| 25   | 45.5                | 0.0                   | 26   | 47.0                | 0.0                   |
| 27   | 47.6                | 0.7                   | 28   | 47.9                | 0.1                   |
| 29   | 49.4                | 0.3                   | 30   | 51.3                | 0.2                   |
| 31   | 52.9                | 0.1                   | 32   | 55.1                | 0.0                   |
| 33   | 56.2                | 0.1                   | 34   | 58.4                | 0.0                   |
| 35   | 59.4                | 0.0                   | 36   | 59.9                | 0.1                   |
| 37   | 61.9                | 0.1                   | 38   | 65.5                | 0.2                   |
| 39   | 68.3                | 0.0                   | 40   | 69.2                | 0.2                   |
| 41   | 71.2                | 0.0                   | 42   | 71.6                | 0.1                   |
| 43   | 71.8                | 0.0                   | 44   | 71.8                | 0.2                   |
| 45   | 74.1                | 0.0                   | 46   | 74.3                | 0.1                   |
| 47   | 76.9                | 0.1                   | 48   | 79.1                | 0.6                   |
| 49   | 80.7                | 0.0                   | 50   | 81.7                | 0.1                   |
| 51   | 82.3                | 1.3                   | 52   | 83.4                | 0.0                   |
| 53   | 89.4                | 0.9                   | 54   | 89.7                | 0.1                   |

Table S54 Intensity and frequency values for the ground state vibrational modes of the K<sub>20</sub>Y cluster.

| Mode | Frequency<br>[1/cm] | Intensity<br>[Km/mol] | Mode | Frequency<br>[1/cm] | Intensity<br>[Km/mol] |
|------|---------------------|-----------------------|------|---------------------|-----------------------|
| 1    | 3.1                 | 0.0                   | 2    | 10.7                | 0.0                   |
| 3    | 12.7                | 0.0                   | 4    | 16.9                | 0.2                   |
| 5    | 18.3                | 0.0                   | 6    | 20.1                | 0.1                   |
| 7    | 21.7                | 0.1                   | 8    | 22.1                | 0.1                   |
| 9    | 25.4                | 0.1                   | 10   | 27.9                | 0.0                   |
| 11   | 29.3                | 0.1                   | 12   | 30.0                | 0.3                   |
| 13   | 31.2                | 0.0                   | 14   | 32.5                | 0.1                   |
| 15   | 34.4                | 0.5                   | 16   | 35.1                | 0.0                   |
| 17   | 35.9                | 0.1                   | 18   | 37.0                | 0.1                   |
| 19   | 37.8                | 0.0                   | 20   | 39.1                | 0.1                   |
| 21   | 40.7                | 0.2                   | 22   | 41.3                | 0.1                   |
| 23   | 42.1                | 0.1                   | 24   | 42.5                | 0.1                   |
| 25   | 44.5                | 0.1                   | 26   | 44.6                | 0.1                   |
| 27   | 46.0                | 0.3                   | 28   | 46.8                | 0.4                   |
| 29   | 47.2                | 0.2                   | 30   | 48.2                | 0.0                   |
| 31   | 49.1                | 0.1                   | 32   | 50.8                | 0.2                   |
| 33   | 52.0                | 0.0                   | 34   | 54.8                | 0.1                   |
| 35   | 56.0                | 0.2                   | 36   | 57.0                | 0.0                   |
| 37   | 57.4                | 0.2                   | 38   | 59.6                | 0.1                   |
| 39   | 60.8                | 0.0                   | 40   | 63.9                | 0.2                   |
| 41   | 65.6                | 0.1                   | 42   | 66.5                | 0.2                   |
| 43   | 68.9                | 0.2                   | 44   | 70.3                | 0.2                   |
| 45   | 72.1                | 0.2                   | 46   | 73.2                | 0.3                   |
| 47   | 74.0                | 0.4                   | 48   | 75.2                | 0.2                   |
| 49   | 76.2                | 0.1                   | 50   | 77.1                | 0.2                   |
| 51   | 78.5                | 0.1                   | 52   | 79.3                | 0.1                   |
| 53   | 80.7                | 0.1                   | 54   | 81.4                | 0.0                   |
| 55   | 83.2                | 0.1                   | 56   | 87.2                | 0.0                   |
| 57   | 97.3                | 0.1                   |      |                     |                       |

Table S55 Intensity and frequency values for the ground state vibrational modes of the K<sub>21</sub>Y cluster.

| Mode | Frequency<br>[1/cm] | Intensity<br>[Km/mol] | Mode | Frequency<br>[1/cm] | Intensity<br>[Km/mol] |
|------|---------------------|-----------------------|------|---------------------|-----------------------|
| 1    | 7.6                 | 0.0                   | 2    | 12.8                | 0.0                   |
| 3    | 15.8                | 0.0                   | 4    | 18.3                | 0.0                   |
| 5    | 19.1                | 0.1                   | 6    | 22.6                | 0.2                   |
| 7    | 24.1                | 0.1                   | 8    | 25.3                | 0.0                   |
| 9    | 27.2                | 0.0                   | 10   | 27.6                | 0.1                   |
| 11   | 28.8                | 0.1                   | 12   | 31.1                | 0.0                   |
| 13   | 31.4                | 0.0                   | 14   | 32.7                | 0.1                   |
| 15   | 33.3                | 0.0                   | 16   | 35.2                | 0.0                   |
| 17   | 35.9                | 0.1                   | 18   | 37.6                | 0.1                   |
| 19   | 38.0                | 0.0                   | 20   | 39.2                | 0.0                   |
| 21   | 40.3                | 0.1                   | 22   | 40.5                | 0.2                   |
| 23   | 41.0                | 0.1                   | 24   | 42.2                | 0.0                   |
| 25   | 42.6                | 0.1                   | 26   | 43.7                | 0.0                   |
| 27   | 44.3                | 0.0                   | 28   | 45.1                | 0.2                   |
| 29   | 46.8                | 0.1                   | 30   | 47.7                | 0.0                   |
| 31   | 48.6                | 0.0                   | 32   | 49.5                | 0.1                   |
| 33   | 50.9                | 0.0                   | 34   | 51.5                | 0.1                   |
| 35   | 52.3                | 0.1                   | 36   | 53.6                | 0.0                   |
| 37   | 55.0                | 0.1                   | 38   | 55.7                | 0.0                   |
| 39   | 57.0                | 0.0                   | 40   | 58.2                | 0.0                   |
| 41   | 58.9                | 0.1                   | 42   | 60.8                | 0.3                   |
| 43   | 61.6                | 0.1                   | 44   | 63.6                | 0.1                   |
| 45   | 64.8                | 0.1                   | 46   | 65.8                | 0.6                   |
| 47   | 68.0                | 0.0                   | 48   | 68.2                | 0.1                   |
| 49   | 69.3                | 0.1                   | 50   | 71.9                | 0.1                   |
| 51   | 72.2                | 0.2                   | 52   | 74.9                | 0.1                   |
| 53   | 75.2                | 0.0                   | 54   | 76.7                | 0.4                   |
| 55   | 77.6                | 0.1                   | 56   | 80.2                | 0.1                   |
| 57   | 81.2                | 0.6                   | 58   | 85.6                | 0.5                   |
| 59   | 86.3                | 0.0                   | 60   | 98.3                | 0.7                   |



Table S56 Intensity and frequency values for the ground state vibrational modes of the K<sub>22</sub>Y cluster.

| Mode | Frequency<br>[1/cm] | Intensity<br>[Km/mol] | Mode | Frequency<br>[1/cm] | Intensity<br>[Km/mol] |
|------|---------------------|-----------------------|------|---------------------|-----------------------|
| 1    | 5.5                 | 0.0                   | 2    | 13.5                | 0.1                   |
| 3    | 16.4                | 0.0                   | 4    | 18.0                | 0.1                   |
| 5    | 19.1                | 0.0                   | 6    | 20.7                | 0.0                   |
| 7    | 21.8                | 0.1                   | 8    | 22.6                | 0.1                   |
| 9    | 24.5                | 0.2                   | 10   | 25.2                | 0.0                   |
| 11   | 27.3                | 0.1                   | 12   | 29.0                | 0.1                   |
| 13   | 30.0                | 0.0                   | 14   | 30.7                | 0.0                   |
| 15   | 31.9                | 0.0                   | 16   | 33.3                | 0.1                   |
| 17   | 33.4                | 0.0                   | 18   | 33.7                | 0.1                   |
| 19   | 34.5                | 0.0                   | 20   | 37.7                | 0.0                   |
| 21   | 38.5                | 0.1                   | 22   | 39.1                | 0.0                   |
| 23   | 40.2                | 0.0                   | 24   | 41.1                | 0.0                   |
| 25   | 42.1                | 0.1                   | 26   | 43.1                | 0.0                   |
| 27   | 43.5                | 0.1                   | 28   | 44.1                | 0.1                   |
| 29   | 44.5                | 0.0                   | 30   | 45.1                | 0.0                   |
| 31   | 47.0                | 0.1                   | 32   | 47.3                | 0.2                   |
| 33   | 48.2                | 0.1                   | 34   | 49.8                | 0.2                   |
| 35   | 50.4                | 0.3                   | 36   | 51.1                | 0.0                   |
| 37   | 52.5                | 0.1                   | 38   | 53.9                | 0.1                   |
| 39   | 54.2                | 0.1                   | 40   | 55.1                | 0.1                   |
| 41   | 57.6                | 0.1                   | 42   | 59.1                | 0.1                   |
| 43   | 59.8                | 0.0                   | 44   | 60.2                | 0.0                   |
| 45   | 61.3                | 0.0                   | 46   | 64.6                | 0.0                   |
| 47   | 65.6                | 0.7                   | 48   | 68.2                | 0.1                   |
| 49   | 69.3                | 0.1                   | 50   | 69.9                | 0.0                   |
| 51   | 70.6                | 0.3                   | 52   | 71.6                | 0.0                   |
| 53   | 72.8                | 0.1                   | 54   | 74.3                | 0.0                   |
| 55   | 75.9                | 0.0                   | 56   | 76.8                | 0.0                   |
| 57   | 77.8                | 0.0                   | 58   | 79.0                | 0.0                   |
| 59   | 80.1                | 0.1                   | 60   | 82.6                | 0.2                   |
| 61   | 85.0                | 0.1                   | 62   | 88.2                | 0.0                   |
| 63   | 91.4                | 1.3                   |      |                     |                       |

Table S57 Intensity and frequency values for the ground state vibrational modes of the K<sub>23</sub>Y cluster.

| Mode | Frequency<br>[1/cm] | Intensity<br>[Km/mol] | Mode | Frequency<br>[1/cm] | Intensity<br>[Km/mol] |
|------|---------------------|-----------------------|------|---------------------|-----------------------|
| 1    | 10.9                | 0.0                   | 2    | 13.1                | 0.0                   |
| 3    | 13.2                | 0.0                   | 4    | 15.9                | 0.0                   |
| 5    | 17.5                | 0.0                   | 6    | 20.1                | 0.1                   |
| 7    | 20.4                | 0.2                   | 8    | 22.3                | 0.2                   |
| 9    | 23.4                | 0.1                   | 10   | 24.0                | 0.1                   |
| 11   | 26.0                | 0.1                   | 12   | 26.4                | 0.3                   |
| 13   | 26.9                | 0.1                   | 14   | 28.6                | 0.2                   |
| 15   | 29.7                | 0.1                   | 16   | 31.0                | 0.3                   |
| 17   | 31.2                | 0.6                   | 18   | 31.6                | 0.1                   |
| 19   | 34.1                | 0.0                   | 20   | 34.9                | 0.1                   |
| 21   | 35.3                | 0.0                   | 22   | 36.0                | 0.0                   |
| 23   | 36.6                | 0.4                   | 24   | 38.4                | 0.0                   |
| 25   | 38.9                | 0.1                   | 26   | 40.3                | 0.1                   |
| 27   | 40.6                | 0.1                   | 28   | 41.3                | 0.4                   |
| 29   | 41.6                | 0.0                   | 30   | 43.7                | 0.3                   |
| 31   | 43.8                | 0.3                   | 32   | 45.0                | 0.1                   |
| 33   | 46.3                | 0.1                   | 34   | 47.3                | 0.0                   |
| 35   | 48.5                | 0.0                   | 36   | 49.7                | 0.0                   |
| 37   | 50.3                | 0.1                   | 38   | 51.6                | 0.1                   |
| 39   | 51.6                | 0.3                   | 40   | 54.3                | 0.0                   |
| 41   | 55.3                | 0.0                   | 42   | 56.0                | 0.1                   |
| 43   | 58.6                | 0.1                   | 44   | 59.5                | 0.1                   |
| 45   | 61.3                | 0.0                   | 46   | 63.0                | 0.3                   |
| 47   | 64.3                | 0.0                   | 48   | 65.1                | 0.1                   |
| 49   | 67.1                | 0.0                   | 50   | 67.8                | 0.1                   |
| 51   | 68.1                | 0.1                   | 52   | 69.2                | 0.2                   |
| 53   | 71.3                | 0.2                   | 54   | 71.9                | 0.0                   |
| 55   | 72.7                | 0.0                   | 56   | 74.2                | 0.0                   |
| 57   | 75.4                | 0.0                   | 58   | 76.7                | 0.0                   |
| 59   | 76.9                | 0.0                   | 60   | 78.3                | 0.1                   |
| 61   | 78.6                | 0.1                   | 62   | 80.8                | 0.0                   |
| 63   | 82.3                | 0.0                   | 64   | 84.1                | 0.0                   |
| 65   | 85.0                | 0.0                   | 66   | 86.4                | 0.0                   |

Table S58 Intensity and frequency values for the ground state vibrational modes of the K<sub>24</sub>Y cluster.

| Mode | Frequency<br>[1/cm] | Intensity<br>[Km/mol] | Mode | Frequency<br>[1/cm] | Intensity<br>[Km/mol] |
|------|---------------------|-----------------------|------|---------------------|-----------------------|
| 1    | 9.6                 | 0.0                   | 2    | 11.5                | 0.0                   |
| 3    | 12.1                | 0.0                   | 4    | 17.2                | 0.0                   |
| 5    | 17.7                | 0.0                   | 6    | 19.6                | 0.0                   |
| 7    | 20.2                | 0.0                   | 8    | 22.2                | 0.1                   |
| 9    | 24.1                | 0.1                   | 10   | 24.6                | 0.0                   |
| 11   | 25.3                | 0.0                   | 12   | 26.2                | 0.0                   |
| 13   | 27.6                | 0.3                   | 14   | 28.9                | 0.0                   |
| 15   | 30.4                | 0.3                   | 16   | 30.6                | 0.0                   |
| 17   | 31.4                | 0.0                   | 18   | 32.7                | 0.1                   |
| 19   | 33.3                | 0.0                   | 20   | 34.4                | 0.0                   |
| 21   | 35.8                | 0.1                   | 22   | 36.6                | 0.1                   |
| 23   | 37.0                | 0.0                   | 24   | 38.1                | 0.1                   |
| 25   | 38.7                | 0.1                   | 26   | 40.2                | 0.2                   |
| 27   | 41.4                | 0.0                   | 28   | 42.6                | 0.0                   |
| 29   | 43.6                | 0.1                   | 30   | 44.7                | 0.0                   |
| 31   | 45.6                | 0.0                   | 32   | 46.7                | 0.1                   |
| 33   | 48.2                | 0.0                   | 34   | 49.4                | 0.0                   |
| 35   | 49.9                | 0.0                   | 36   | 51.1                | 0.1                   |
| 37   | 52.0                | 0.1                   | 38   | 52.9                | 0.1                   |
| 39   | 53.0                | 0.2                   | 40   | 53.9                | 0.1                   |
| 41   | 55.0                | 0.0                   | 42   | 55.9                | 0.0                   |
| 43   | 56.7                | 0.2                   | 44   | 57.4                | 0.1                   |
| 45   | 58.4                | 0.1                   | 46   | 59.1                | 0.1                   |
| 47   | 59.3                | 0.0                   | 48   | 61.1                | 0.1                   |
| 49   | 61.7                | 0.0                   | 50   | 62.3                | 0.1                   |
| 51   | 62.8                | 0.1                   | 52   | 63.8                | 0.1                   |
| 53   | 64.3                | 0.0                   | 54   | 65.1                | 0.1                   |
| 55   | 66.6                | 0.1                   | 56   | 67.7                | 0.1                   |
| 57   | 69.0                | 0.0                   | 58   | 69.8                | 0.2                   |
| 59   | 70.4                | 0.1                   | 60   | 72.2                | 0.0                   |
| 61   | 73.2                | 0.0                   | 62   | 74.7                | 0.2                   |
| 63   | 76.9                | 0.0                   | 64   | 77.4                | 0.1                   |
| 65   | 80.4                | 0.1                   | 66   | 81.3                | 0.1                   |
| 67   | 91.4                | 0.5                   | 68   | 93.7                | 1.1                   |
| 69   | 95.1                | 0.4                   |      |                     |                       |

Table S59 Intensity and frequency values for the ground state vibrational modes of the K<sub>11</sub>Y<sub>2</sub> cluster.

| Mode | Frequency<br>[1/cm] | Intensity<br>[Km/mol] | Mode | Frequency<br>[1/cm] | Intensity<br>[Km/mol] |
|------|---------------------|-----------------------|------|---------------------|-----------------------|
| 1    | 28.0                | 0.1                   | 2    | 32.4                | 0.0                   |
| 3    | 34.0                | 0.1                   | 4    | 35.8                | 0.3                   |
| 5    | 36.3                | 0.1                   | 6    | 37.9                | 0.1                   |
| 7    | 40.6                | 0.2                   | 8    | 41.2                | 0.3                   |
| 9    | 42.4                | 0.1                   | 10   | 44.2                | 0.4                   |
| 11   | 46.7                | 0.1                   | 12   | 49.6                | 0.0                   |
| 13   | 51.5                | 0.0                   | 14   | 54.1                | 0.1                   |
| 15   | 54.5                | 0.9                   | 16   | 55.8                | 0.1                   |
| 17   | 59.3                | 0.3                   | 18   | 62.3                | 0.2                   |
| 19   | 64.0                | 0.4                   | 20   | 65.6                | 0.1                   |
| 21   | 65.8                | 0.2                   | 22   | 66.9                | 0.2                   |
| 23   | 69.9                | 0.1                   | 24   | 73.7                | 0.1                   |
| 25   | 74.4                | 0.1                   | 26   | 75.2                | 0.4                   |
| 27   | 75.5                | 0.4                   | 28   | 79.4                | 0.2                   |
| 29   | 80.2                | 0.3                   | 30   | 84.6                | 0.3                   |
| 31   | 100.7               | 2.1                   | 32   | 103.2               | 3.0                   |
| 33   | 121.5               | 0.0                   |      |                     |                       |

Table S60 Intensity and frequency values for the ground state vibrational modes of the  $K_{10}Y_3$  cluster.

| Mode | Frequency<br>[1/cm] | Intensity<br>[Km/mol] | Mode | Frequency<br>[1/cm] | Intensity<br>[Km/mol] |
|------|---------------------|-----------------------|------|---------------------|-----------------------|
| 1    | 23.5                | 0.0                   | 2    | 31.9                | 0.0                   |
| 3    | 35.5                | 0.0                   | 4    | 37.9                | 0.0                   |
| 5    | 39.2                | 0.0                   | 6    | 40.3                | 0.0                   |
| 7    | 41.3                | 0.0                   | 8    | 42.8                | 0.4                   |
| 9    | 45.9                | 0.0                   | 10   | 47.6                | 0.1                   |
| 11   | 49.1                | 0.1                   | 12   | 49.4                | 0.1                   |
| 13   | 52.5                | 0.8                   | 14   | 57.4                | 0.0                   |
| 15   | 59.9                | 0.0                   | 16   | 60.4                | 0.1                   |
| 17   | 66.3                | 0.2                   | 18   | 67.3                | 0.0                   |
| 19   | 67.5                | 0.1                   | 20   | 69.2                | 0.0                   |
| 21   | 69.6                | 0.0                   | 22   | 69.6                | 0.1                   |
| 23   | 70.4                | 0.6                   | 24   | 71.3                | 0.0                   |
| 25   | 75.4                | 0.0                   | 26   | 83.9                | 0.4                   |
| 27   | 84.5                | 0.4                   | 28   | 86.7                | 2.0                   |
| 29   | 87.1                | 0.2                   | 30   | 104.1               | 2.4                   |
| 31   | 105.7               | 0.2                   | 32   | 126.3               | 0.9                   |
| 33   | 143.7               | 0.1                   |      |                     |                       |

Table S61 Intensity and frequency values for the ground state vibrational modes of the  $K_{20}Y_2$  cluster.

| Mode | Frequency<br>[1/cm] | Intensity<br>[Km/mol] | Mode | Frequency<br>[1/cm] | Intensity<br>[Km/mol] |
|------|---------------------|-----------------------|------|---------------------|-----------------------|
| 1    | 9.6                 | 0.1                   | 2    | 14.3                | 0.0                   |
| 3    | 18.2                | 0.0                   | 4    | 23.8                | 0.1                   |
| 5    | 23.9                | 0.2                   | 6    | 25.0                | 0.1                   |
| 7    | 26.6                | 0.2                   | 8    | 27.2                | 0.1                   |
| 9    | 28.7                | 0.0                   | 10   | 29.6                | 0.4                   |
| 11   | 32.8                | 0.3                   | 12   | 33.7                | 0.2                   |
| 13   | 34.3                | 0.1                   | 14   | 36.0                | 0.0                   |
| 15   | 37.4                | 0.0                   | 16   | 38.1                | 0.1                   |
| 17   | 39.5                | 0.2                   | 18   | 40.5                | 0.2                   |
| 19   | 42.3                | 0.0                   | 20   | 42.8                | 0.1                   |
| 21   | 43.6                | 0.0                   | 22   | 45.2                | 0.1                   |
| 23   | 46.6                | 0.0                   | 24   | 48.1                | 0.0                   |
| 25   | 49.4                | 0.2                   | 26   | 50.0                | 0.1                   |
| 27   | 52.1                | 0.1                   | 28   | 52.7                | 0.1                   |
| 29   | 54.9                | 0.3                   | 30   | 56.0                | 0.4                   |
| 31   | 56.3                | 0.2                   | 32   | 58.0                | 0.4                   |
| 33   | 59.5                | 0.2                   | 34   | 61.4                | 0.7                   |
| 35   | 62.7                | 0.9                   | 36   | 63.7                | 1.1                   |
| 37   | 64.7                | 0.1                   | 38   | 67.2                | 0.1                   |
| 39   | 67.9                | 0.1                   | 40   | 70.5                | 0.3                   |
| 41   | 71.6                | 0.8                   | 42   | 71.9                | 0.0                   |
| 43   | 73.2                | 0.3                   | 44   | 74.2                | 0.0                   |
| 45   | 75.3                | 0.1                   | 46   | 75.6                | 0.1                   |
| 47   | 76.9                | 0.1                   | 48   | 77.5                | 0.0                   |
| 49   | 78.1                | 0.0                   | 50   | 79.3                | 0.0                   |
| 51   | 80.4                | 0.0                   | 52   | 82.7                | 0.2                   |
| 53   | 83.2                | 0.2                   | 54   | 86.5                | 0.2                   |
| 55   | 88.3                | 0.0                   | 56   | 90.5                | 0.2                   |
| 57   | 94.5                | 0.1                   | 58   | 96.5                | 0.0                   |
| 59   | 100.2               | 0.0                   | 60   | 107.0               | 0.0                   |

Table S62 Intensity and frequency values for the ground state vibrational modes of the  $K_{19}Y_3$  cluster.

| Mode | Frequency<br>[1/cm] | Intensity<br>[Km/mol] | Mode | Frequency<br>[1/cm] | Intensity<br>[Km/mol] |
|------|---------------------|-----------------------|------|---------------------|-----------------------|
| 1    | 15.2                | 0.0                   | 2    | 22.8                | 0.0                   |
| 3    | 25.5                | 0.0                   | 4    | 27.4                | 0.1                   |
| 5    | 27.7                | 0.0                   | 6    | 29.4                | 0.0                   |
| 7    | 30.6                | 0.2                   | 8    | 32.7                | 0.0                   |
| 9    | 33.8                | 0.1                   | 10   | 35.7                | 0.0                   |
| 11   | 36.6                | 0.0                   | 12   | 37.4                | 0.0                   |
| 13   | 39.1                | 0.0                   | 14   | 40.9                | 0.1                   |
| 15   | 41.6                | 0.1                   | 16   | 43.1                | 0.0                   |
| 17   | 43.6                | 0.0                   | 18   | 44.5                | 0.1                   |
| 19   | 45.9                | 0.4                   | 20   | 46.3                | 0.3                   |
| 21   | 47.5                | 0.4                   | 22   | 49.5                | 0.1                   |
| 23   | 50.4                | 0.1                   | 24   | 50.6                | 0.0                   |
| 25   | 51.7                | 0.2                   | 26   | 53.6                | 0.2                   |
| 27   | 54.0                | 0.2                   | 28   | 54.5                | 0.5                   |
| 29   | 54.7                | 0.4                   | 30   | 56.6                | 0.1                   |
| 31   | 57.7                | 1.1                   | 32   | 59.1                | 0.2                   |
| 33   | 59.2                | 0.2                   | 34   | 62.1                | 0.1                   |
| 35   | 62.6                | 0.1                   | 36   | 63.8                | 0.1                   |
| 37   | 64.6                | 0.0                   | 38   | 65.7                | 0.0                   |
| 39   | 66.0                | 0.0                   | 40   | 67.0                | 0.1                   |
| 41   | 67.7                | 0.0                   | 42   | 71.0                | 0.1                   |
| 43   | 72.0                | 0.3                   | 44   | 73.2                | 0.0                   |
| 45   | 74.0                | 0.2                   | 46   | 75.1                | 0.1                   |
| 47   | 75.3                | 0.2                   | 48   | 76.2                | 0.1                   |
| 49   | 76.8                | 0.4                   | 50   | 78.8                | 0.0                   |
| 51   | 79.3                | 0.0                   | 52   | 82.9                | 0.0                   |
| 53   | 84.4                | 1.1                   | 54   | 84.8                | 2.1                   |
| 55   | 88.7                | 0.2                   | 56   | 92.2                | 0.1                   |
| 57   | 101.1               | 1.4                   | 58   | 122.4               | 0.1                   |
| 59   | 124.7               | 0.0                   | 60   | 140.4               | 0.0                   |
